# Supplementary material for: Differences in Highly Pathogenic H5N6 Avian Influenza Viral Pathogenicity and Inflammatory Response in Chickens and Ducks
Source: PubMed Central journal article supplement (PMC7878534; doi:10.3389/fmicb.2021.593202), 2021-01-29
Supplement: Presentation_1.pdf [file Presentation_1.pdf]

## *Supplementary Material*

# **Pathogenicity of highly pathogenic H5N6 avian influenza viruses and associated inflammatory response in chickens and ducks**

**Bo Wang<sup>1,2</sup>, Qianqian Su<sup>1,2</sup>, Jing Luo<sup>1</sup>, Meng Li<sup>1</sup>, Qiaoxing Wu<sup>1</sup>, Chengmei Huang<sup>1,2</sup>, Juan Du<sup>1,2</sup>, Jiajun Ma<sup>1,2</sup>, Han Chang<sup>1,2</sup>, Shuyi Han<sup>1</sup>, Guohui Yuan<sup>1</sup>, Yapeng He<sup>1</sup>, Minglei Guo<sup>1</sup>, Qingxun Zhang<sup>1</sup>, Hongxuan He<sup>1\*</sup>**

<sup>1</sup> National Research Center for Wildlife-Borne Diseases, Institute of Zoology, Chinese Academy of Sciences, Beijing, China

<sup>2</sup> College of Life Science, University of Chinese Academy of Sciences, Beijing, China

**\* Correspondence:**

Corresponding Author: Hongxuan He, Ph.D., Executive Deputy Director of National Research Centre for Wildlife Borne Diseases, Institute of Zoology, Chinese Academy of Sciences. Add: No.1-5 Beichenxilu, Chaoyang District, Beijing 100101, P.R. China. Tel: 86-10-64807118(O/F). E-mail: hehx@ioz.ac.cn

A(PB2)

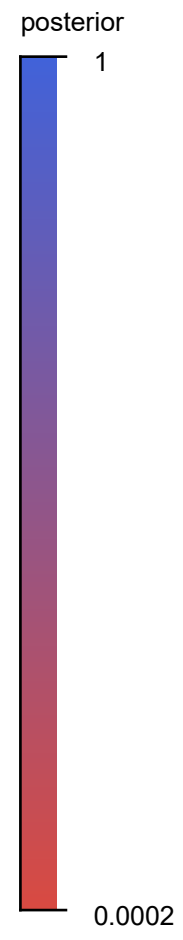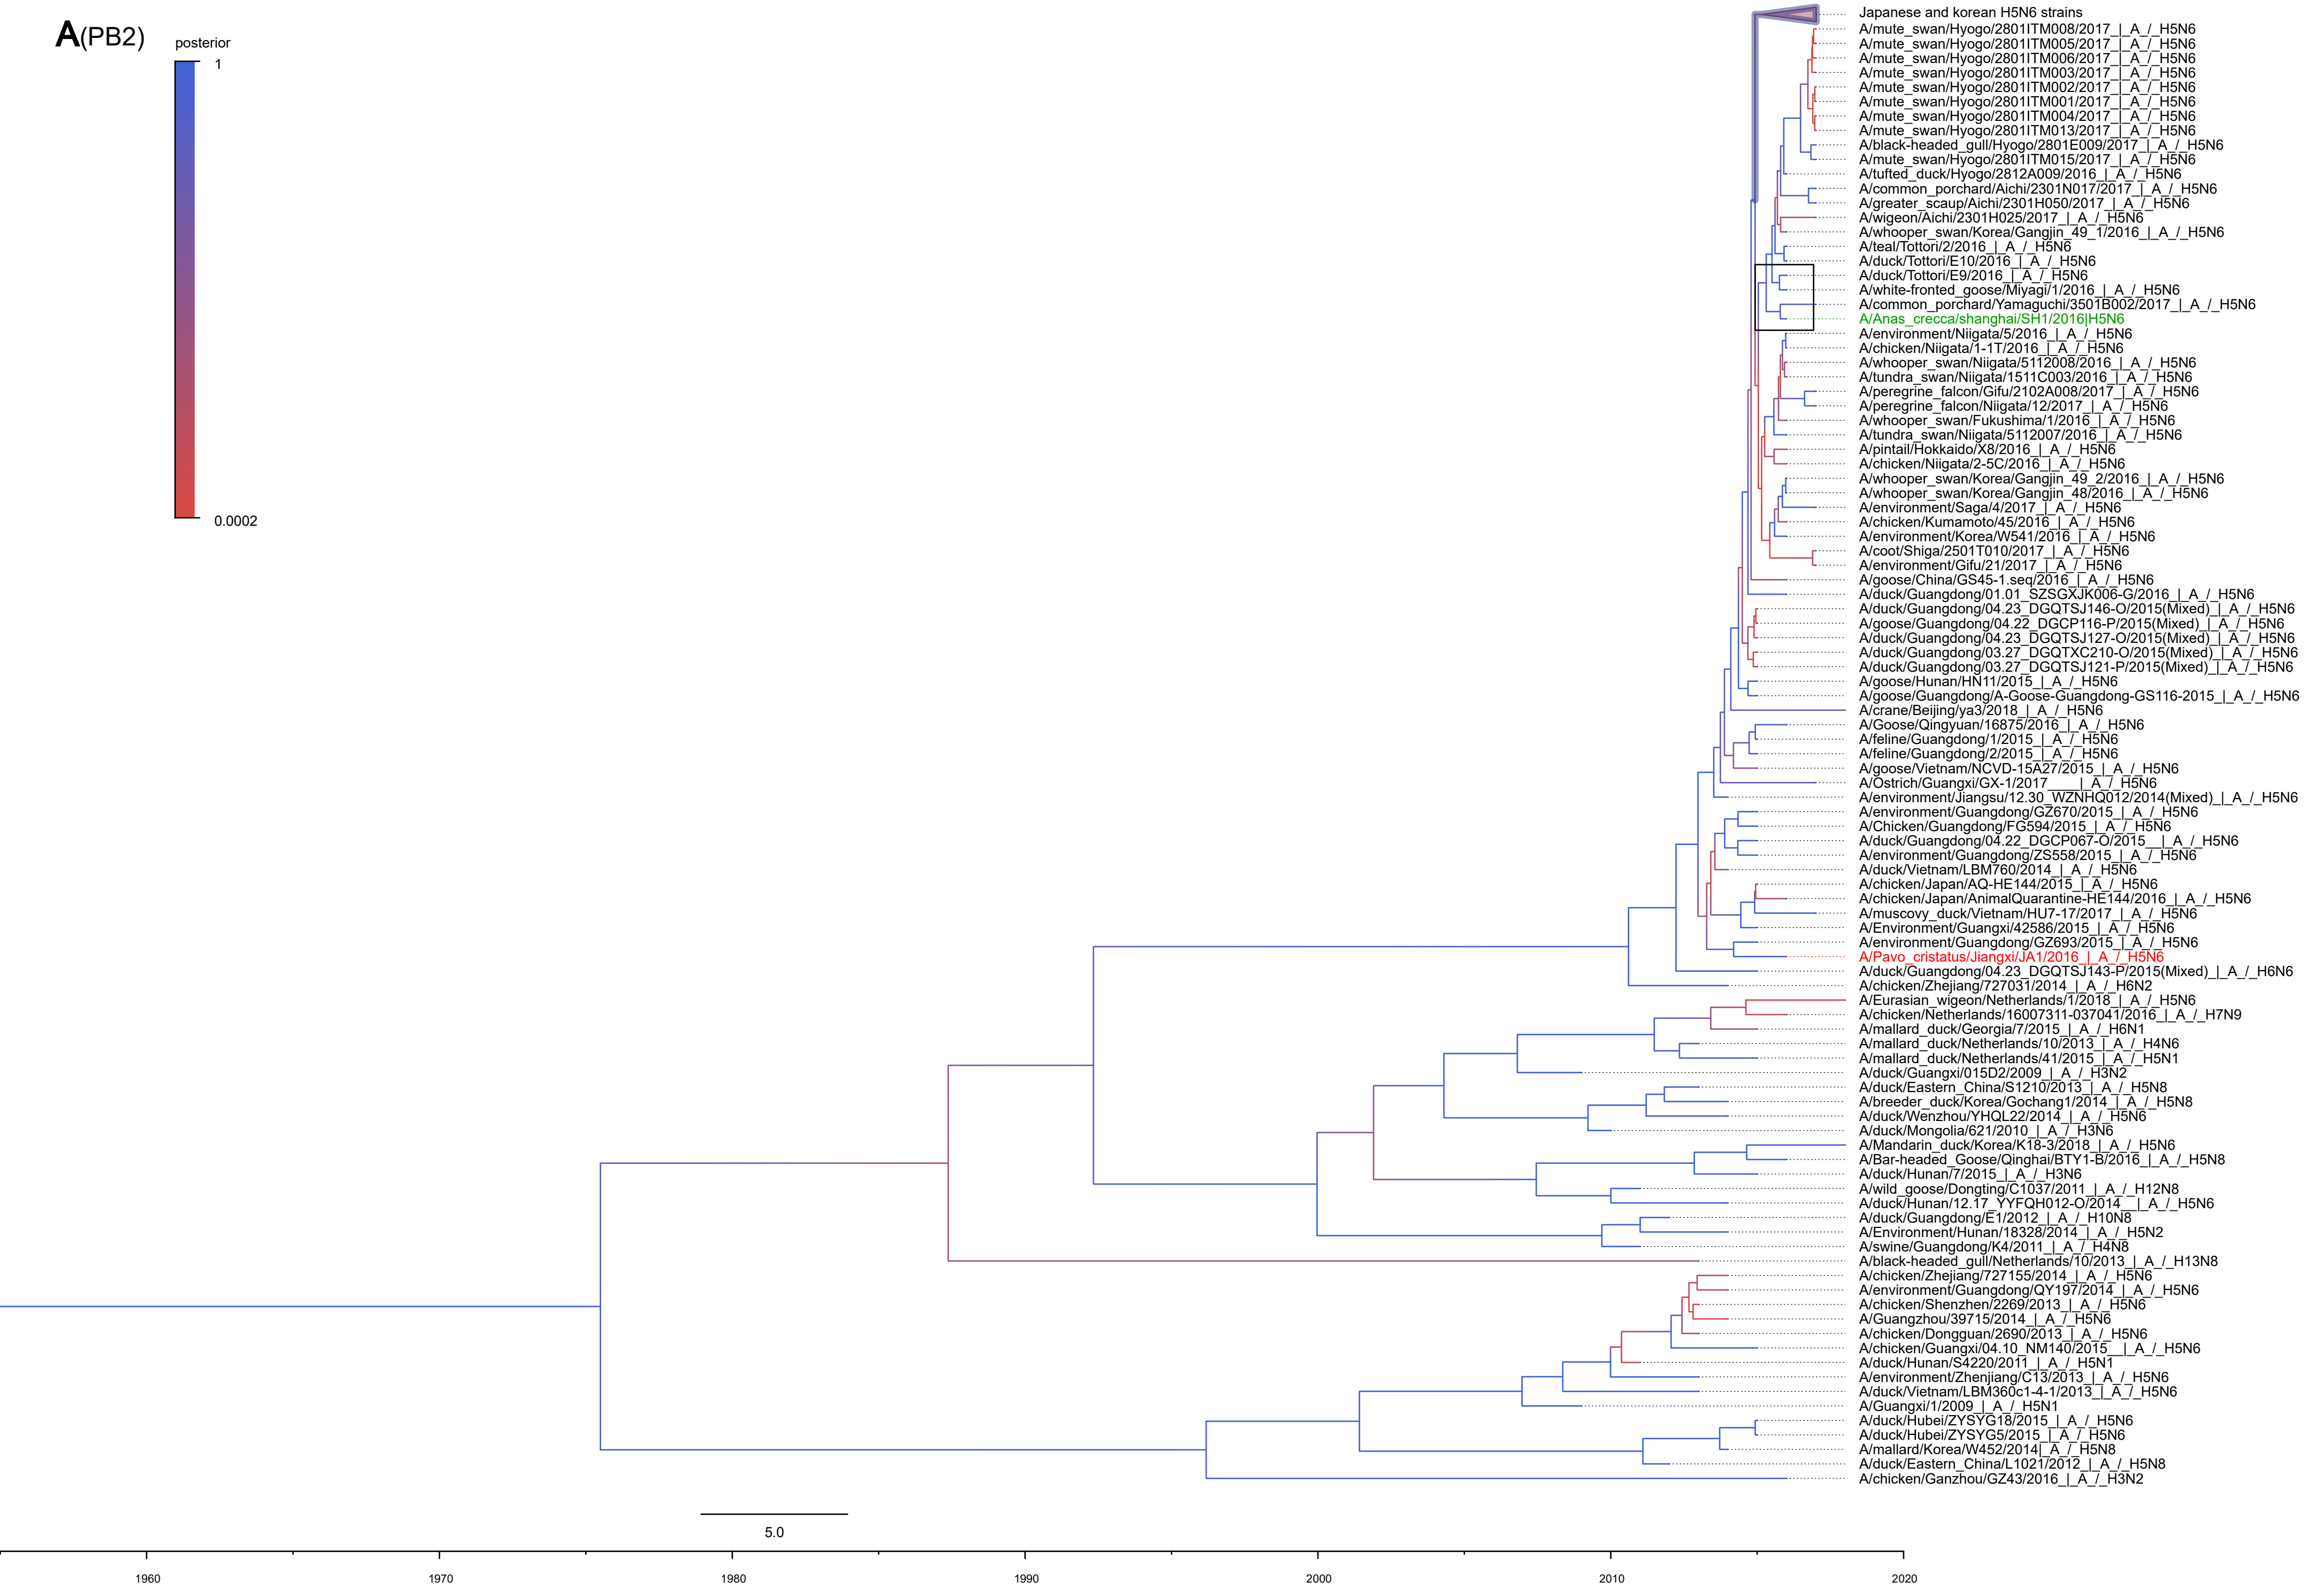

B(PB1)

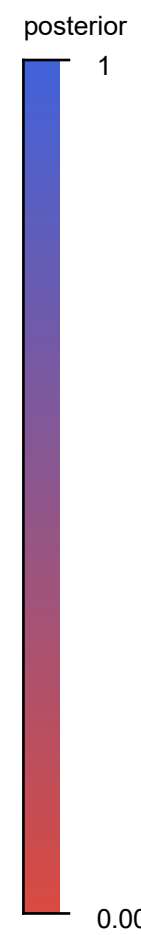

- Japanese and Korean H5N6 strains
- A/mute\_swan/Hyogo/2801ITM005/2017 | A / H5N6
- A/mute\_swan/Hyogo/2801ITM013/2017 | A / H5N6
- A/mute\_swan/Hyogo/2801ITM014/2017 | A / H5N6
- A/mute\_swan/Hyogo/2801ITM003/2017 | A / H5N6
- A/mute\_swan/Hyogo/2801ITM009/2017 | A / H5N6
- A/mute\_swan/Hyogo/2801ITM002/2017 | A / H5N6
- A/mute\_swan/Hyogo/2801ITM007/2017 | A / H5N6
- A/mute\_swan/Hyogo/2801ITM001/2017 | A / H5N6
- A/mute\_swan/Hyogo/2801ITM004/2017 | A / H5N6
- A/mute\_swan/Hyogo/2801ITM006/2017 | A / H5N6
- A/tufted\_duck/Hyogo/2812A009/2016 | A / H5N6
- A/common\_porchard/Aichi/2301N025/2017 | A / H5N6
- A/greater\_scaup/Aichi/2301N021/2017 | A / H5N6
- A/common\_porchard/Aichi/2301N017/2017 | A / H5N6
- A/greater\_scaup/Aichi/2301H050/2017 | A / H5N6
- A/white-fronted\_goose/Miyagi/1/2016 | A / H5N6
- A/duck/Tottori/E9/2016 | A / H5N6
- A/whooper\_swan/Korea/Gangjin\_49\_1/2016 | A / H5N6
- A/wigeon/Aichi/2301H025/2017 | A / H5N6
- A/teal/Tottori/2/2016 | A / H5N6
- A/duck/Tottori/E10/2016 | A / H5N6
- A/peregrine\_falcon/Gifu/2102A008/2017 | A / H5N6
- A/peregrine\_falcon/Niigata/12/2017 | A / H5N6
- A/whooper\_swan/Fukushima/1/2016 | A / H5N6
- A/environment/Niigata/5/2016 | A / H5N6
- A/chicken/Niigata/1-2C/2016 | A / H5N6
- A/tundra\_swan/Niigata/1511C003/2016 | A / H5N6
- A/whooper\_swan/Niigata/5112008/2016 | A / H5N6
- A/tundra\_swan/Niigata/5112007/2016 | A / H5N6
- A/wild\_duck/South\_Korea/1915/2019 | A / H5N6
- A/wild\_duck/South\_Korea/1914/2019 | A / H5N6
- A/wild\_duck/South\_Korea/1908/2019 | A / H5N6
- A/environment/Korea/W541/2016 | A / H5N6
- A/Anas\_platyrhynchos/South\_Korea/1702/2017 | A / H5N6
- A/wild\_bird(Anas\_platyrhynchos)/South\_Korea/1710/2017 | A / H5N6
- A/whooper\_swan/Korea/Gangjin\_48/2016 | A / H5N6
- A/environment/Saga/4/2017 | A / H5N6
- A/whooper\_swan/Korea/Gangjin\_49\_2/2016 | A / H5N6
- A/chicken/Kumamoto/45/2016 | A / H5N6
- A/environment/Gifu/21/2017 | A / H5N6
- A/coot/Shiga/2501T010/2017 | A / H5N6
- A/common\_porchard/Yamaguchi/3501B002/2017 | A / H5N6
- A/Anas\_crecca/shanghai/SH1/2016 | A / H5N6
- A/pintail/Hokkaido/X8/2016 | A / H5N6
- A/goose/China/GS42-2.seq/2016 | A / H5N6
- A/chicken/China/G1054/2016 | A / H5N6
- A/Goose/Qingyuan/16875/2016 | A / H5N6
- A/duck/Guangdong/01.01\_SZSGXJK006-G/2016 | A / H5N6
- A/Environment/Hunan/18328/2014 | A / H5N2
- A/duck/Guangdong/E1/2012 | A / H10N8
- A/swine/Guangdong/K4/2011 | A / H4N8
- A/duck/Guangxi/015D2/2009 | A / H3N2
- A/environment/Guangdong/GZ693/2015 | A / H5N6
- A/chicken/Japan/AQ-HE144/2015 | A / H5N6
- A/muscovy\_duck/Vietnam/HU7-17/2017 | A / H5N6
- A/crane/Beijing/ya3/2018 | A / H5N6
- A/Ostrich/Guangxi/GX-1/2017 | A / H5N6
- A/duck/Hunan/7/2015 | A / H3N6
- A/chicken/Ganzhou/GZ43/2016 | A / H3N2
- A/goose/Hunan/HN11/2015 | A / H5N6
- A/feline/Guangdong/1/2015 | A / H5N6
- A/duck/Vietnam/LBM760/2014 | A / H5N6
- A/duck/Vietnam/LBM758/2014 | A / H5N6
- A/Guangzhou/39715/2014 | A / H5N6
- A/environment/Guangdong/ZS558/2015 | A / H5N6
- A/environment/Guangdong/GZ670/2015 | A / H5N6
- A/Pavo\_cristatus/Jiangxi/JA1/2016 | A / H5N6
- A/Chicken/Guangdong/FG594/2015 | A / H5N6
- A/chicken/Zhejiang/727155/2014 | A / H5N6
- A/chicken/Shenzhen/2396/2013 | A / H5N6
- A/chicken/Dongguan/2690/2013 | A / H5N6
- A/chicken/Shenzhen/2269/2013 | A / H5N6
- A/chicken/Guangxi/04.10\_NM140/2015 | A / H5N6
- A/duck/Hunan/12.17\_YGK0057/2014 | A / H5N6
- A/environment/Zhenjiang/C13/2013 | A / H5N6
- A/duck/Vietnam/LBM360c1-4-1/2013 | A / H5N6
- A/duck/Guangdong/S1311/2010 | A / H6N6
- A/chicken/Jiangxi/04.01\_NCDZT0048-O/2015(Mixed) | A / H5N6
- A/Mandarin\_duck/Korea/K18-3/2018 | A / H5N6
- A/Eurasian\_wigeon/Netherlands/1/2018 | A / H5N6
- A/jungle\_crow/Hyogo/2803A002/2018 | A / H5N6
- A/great\_crested\_grebe/Uvs-Nuur\_Lake/341/2016 | A / H5N8
- A/Bar-headed\_Goose/Qinghai/BFY1-B/2016 | A / H5N8
- A/mallard\_duck/Netherlands/30/2014 | A / H4N6
- A/duck/Mongolia/127/2015 | A / H4N6
- A/duck/Eastern\_China/S1210/2013 | A / H5N8
- A/mallard\_duck/Georgia/3/2016 | A / H4N6
- A/breeder\_duck/Korea/Gochang1/2014 | A / H5N8
- A/duck/Jiangsu/k1203/2010 | A / H5N8
- A/duck/Hubei/ZSYG5/2015 | A / H5N6
- A/duck/Hubei/ZSYG18/2015 | A / H5N6
- A/common\_teal/Korea/KU-12/2015 | A / H5N8
- A/duck/Eastern\_China/L1021/2012 | A / H5N8
- A/duck/Hunan/S2046/2011 | A / H4N2

7.0

1940

1960

1980

2000

2020

C(PA)

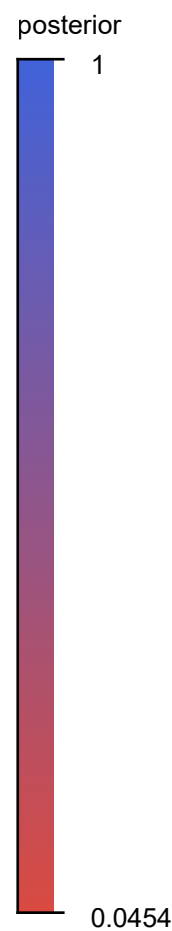

PA-III

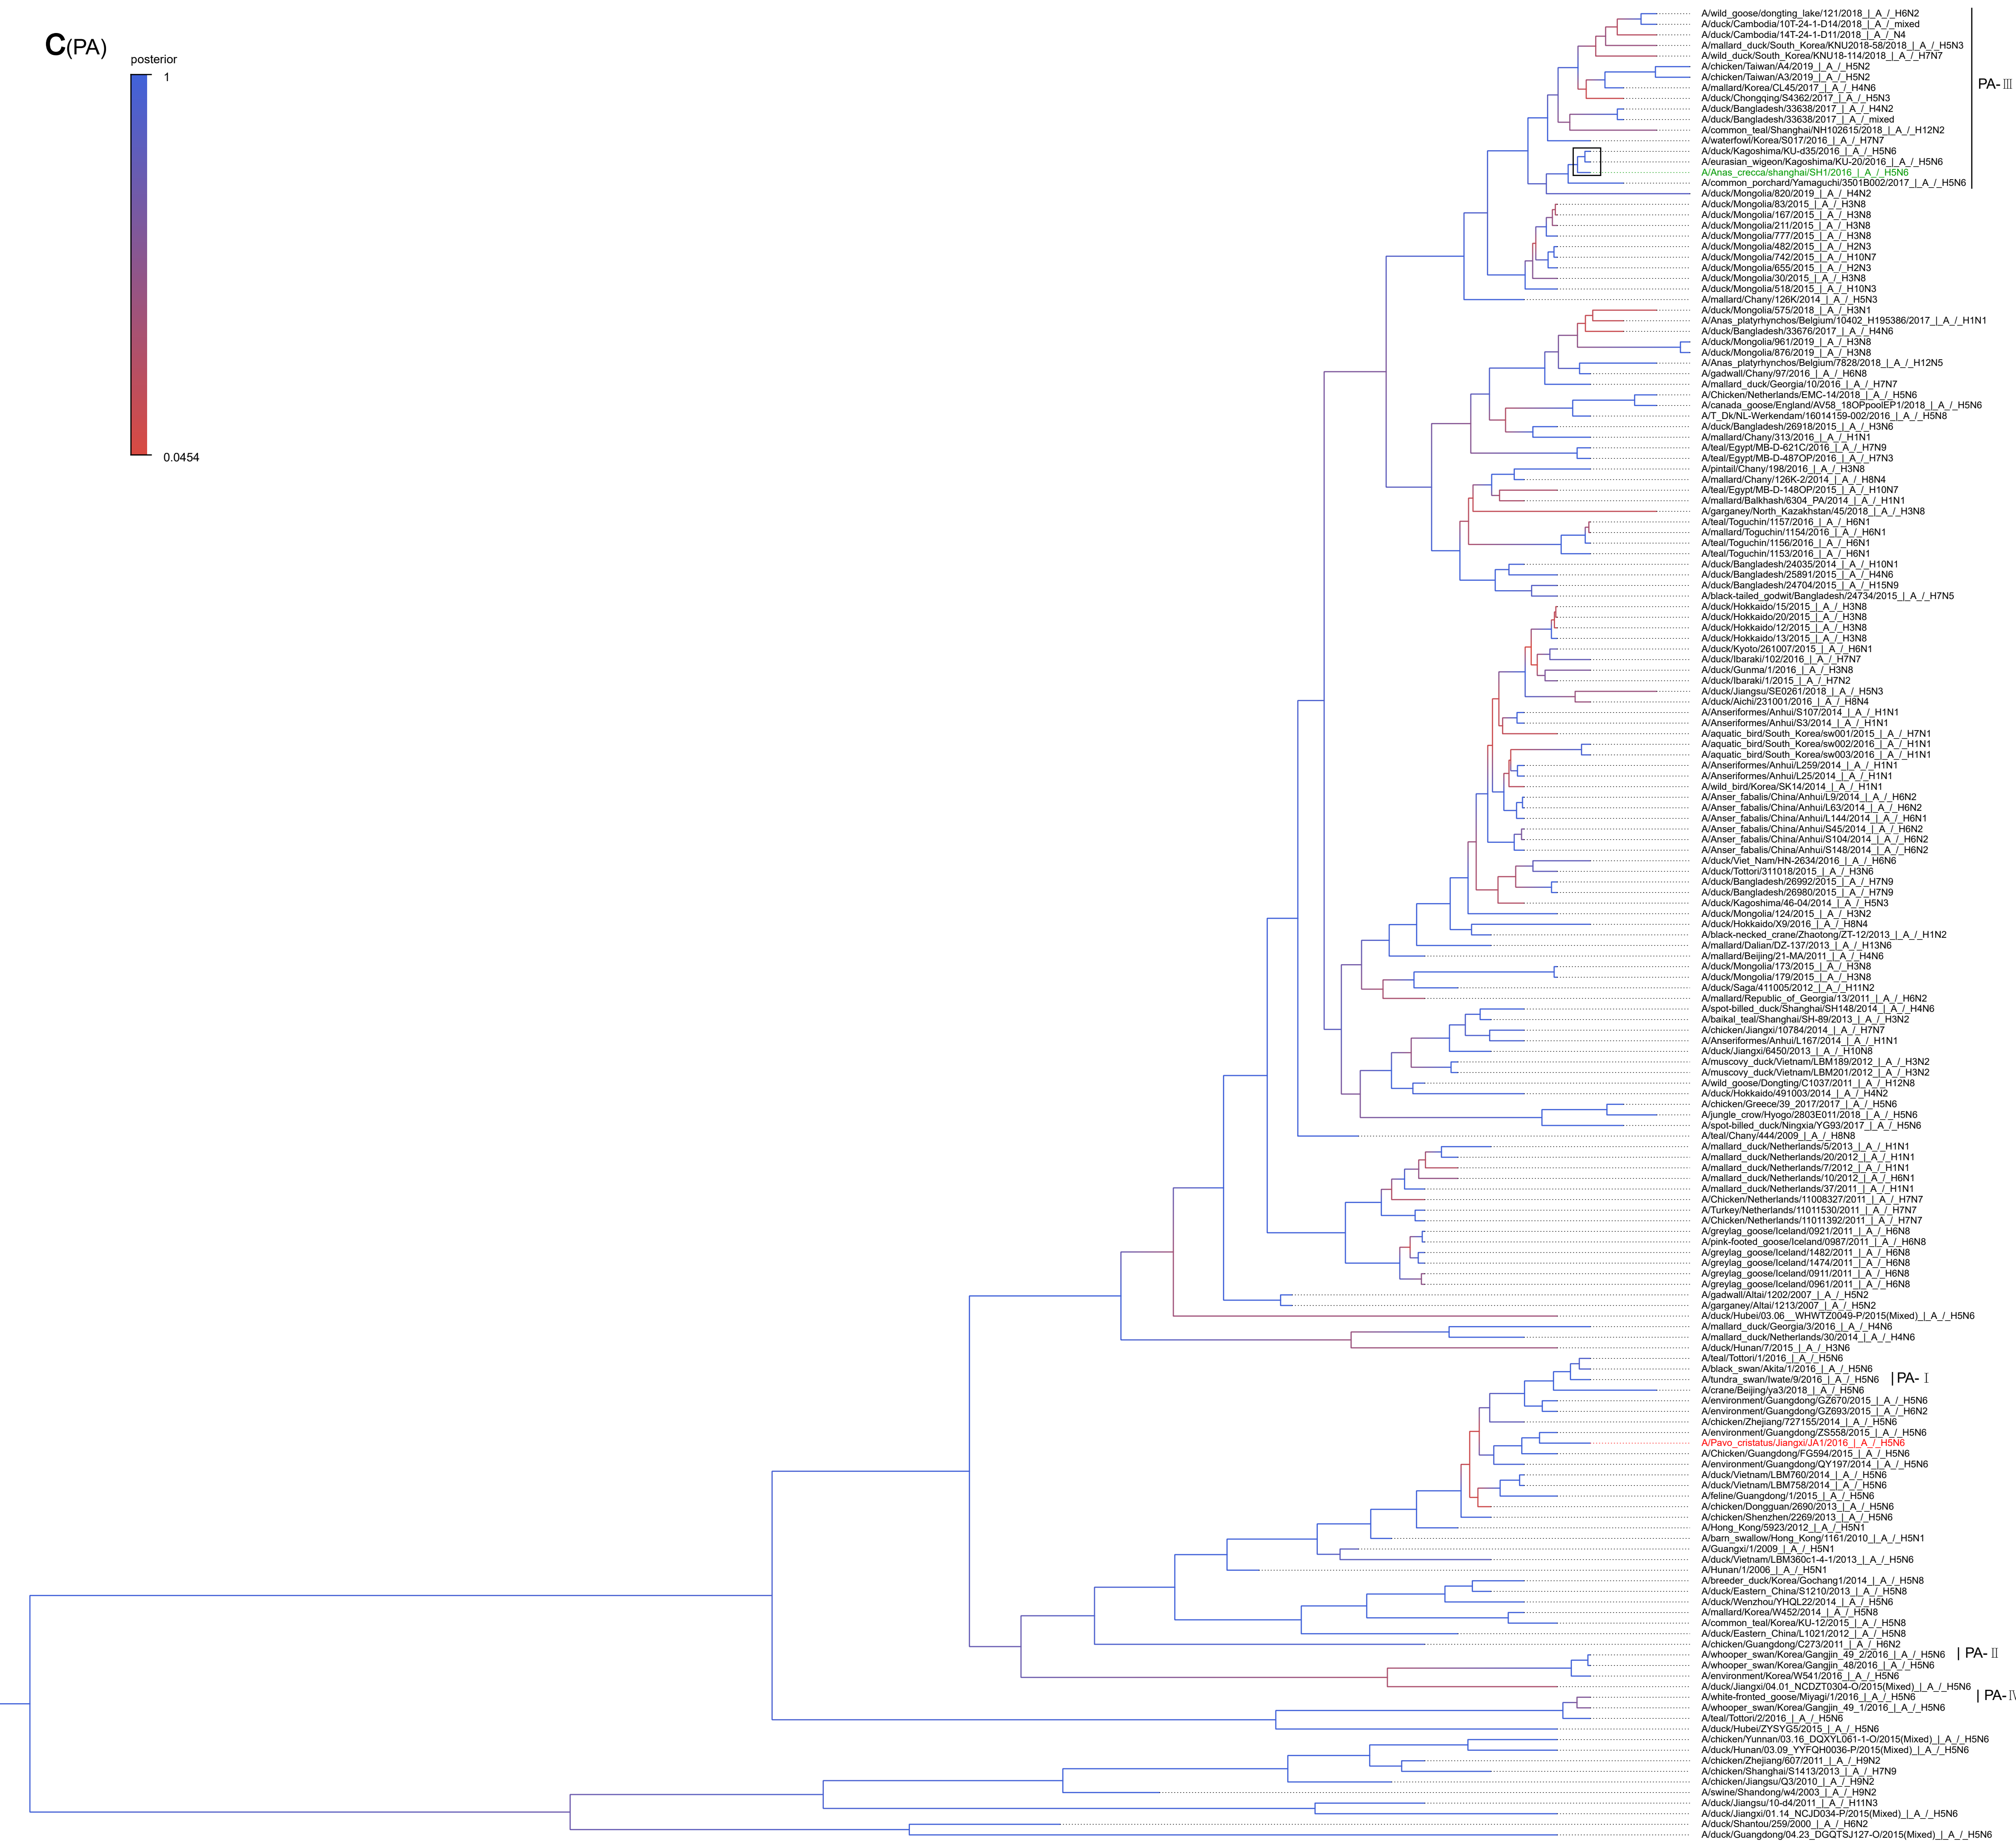

6.0

1975

2000

2025

D(NP)

posterior

1

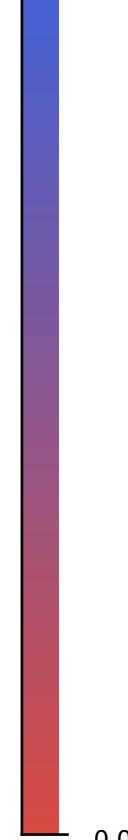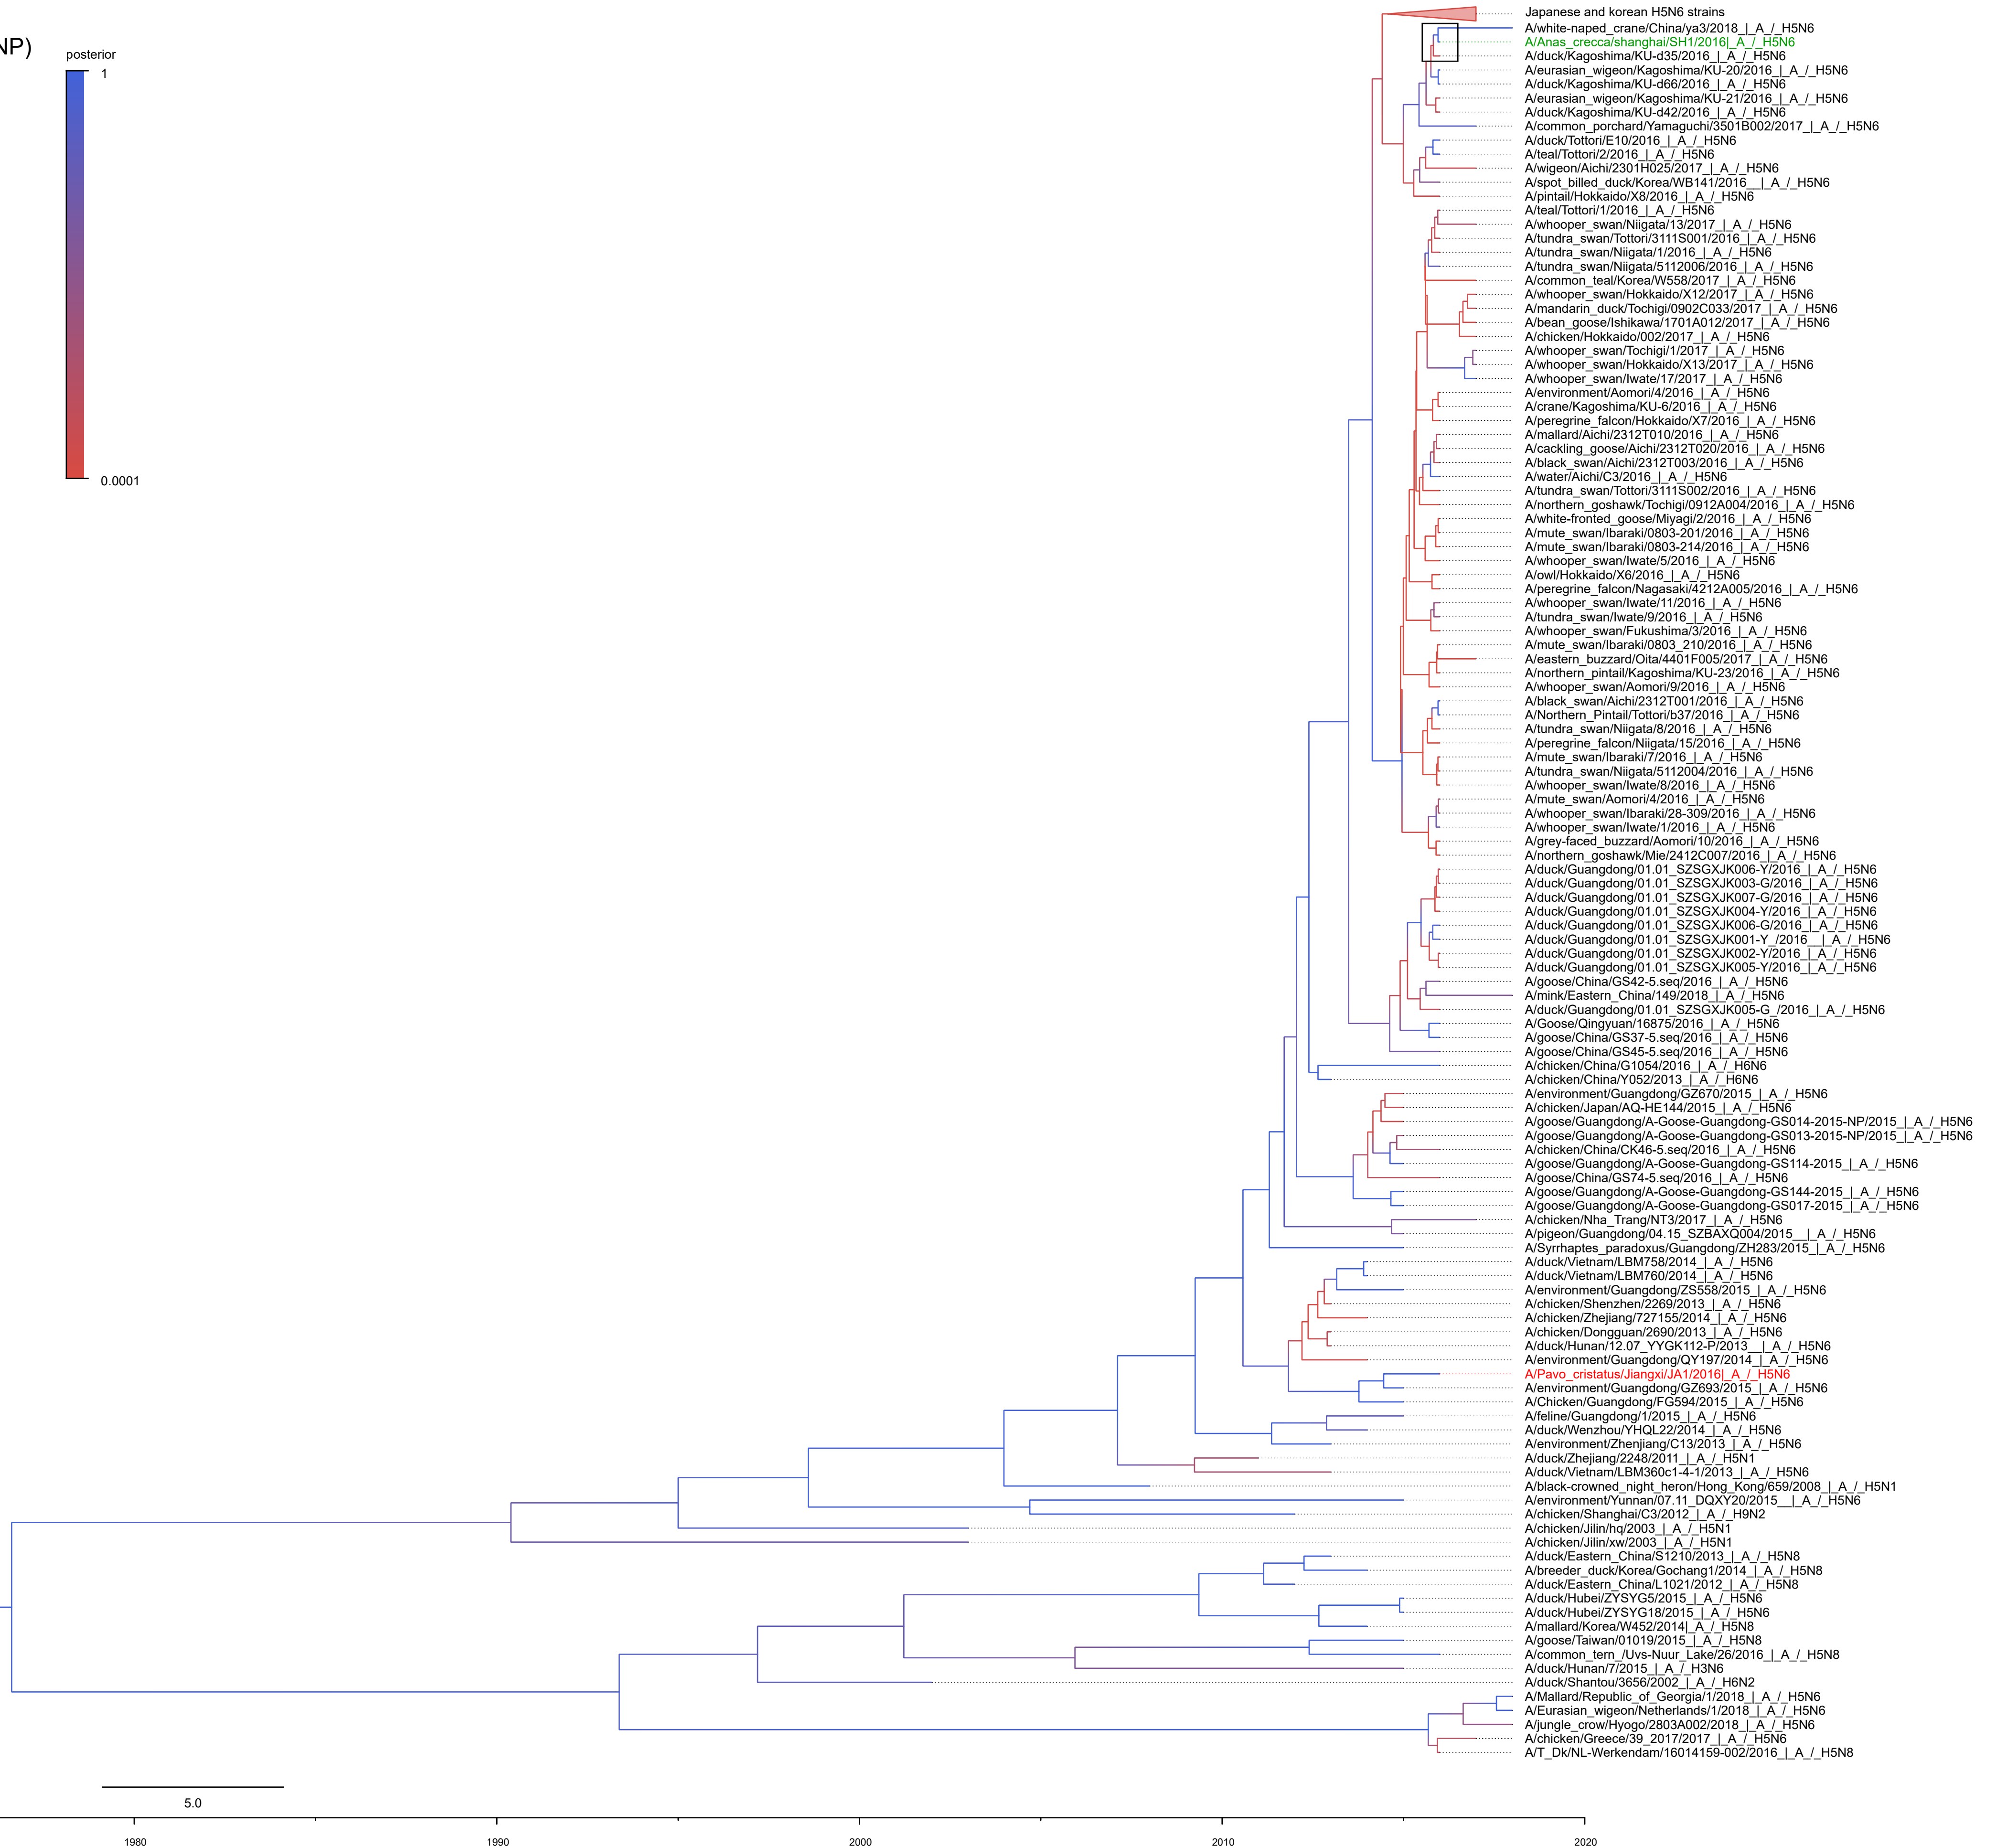

E (M)

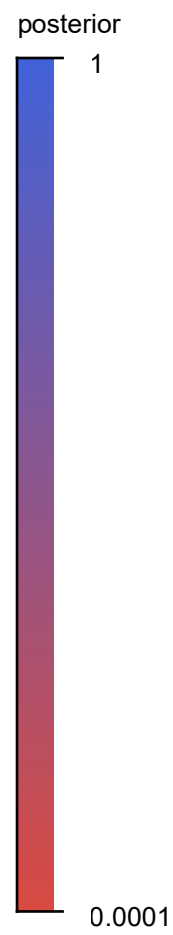

1960 1970 1980 1990 2000 2010 2020

4.0

Japanese and korean H5N6 strains  
A/mute\_swan/Hyogo/28011TM009/2017 | A / H5N6  
A/mute\_swan/Hyogo/28011TM004/2017 | A / H5N6  
A/mute\_swan/Hyogo/28011TM008/2017 | A / H5N6  
A/mute\_swan/Hyogo/28011TM002/2017 | A / H5N6  
A/environment/Gifu/21/2017 | A / H5N6  
A/greater\_scaup/Aichi/2301H050/2017 | A / H5N6  
A/common\_porchard/Aichi/2301N017/2017 | A / H5N6  
A/mute\_swan/Hyogo/28011TM005/2017 | A / H5N6  
A/mute\_swan/Hyogo/28011TM003/2017 | A / H5N6  
A/environment/Saga/4/2017 | A / H5N6  
A/mute\_swan/Hyogo/28011TM013/2017 | A / H5N6  
A/pintail/Hokkaido/X3/2016 | A / H5N6  
A/white-fronted\_goose/Miyagi/1/2016 | A / H5N6  
A/whooper\_swan/Korea/Gangjin\_49\_1/2016 | A / H5N6  
A/chicken/Niigata/2-5C/2016 | A / H5N6  
A/environment/Korea/W541/2016 | A / H5N6  
A/teal/Tottori/2/2016 | A / H5N6  
A/Anas\_crecca/SH1/2016 | A / H5N6  
A/common\_porchard/Yamaguchi/3501B002/2017 | A / H5N6  
A/tufted\_duck/Hyogo/2812A009/2016 | A / H5N6  
A/whooper\_swan/Korea/Gangjin\_48/2016 | A / H5N6  
A/whooper\_swan/Korea/Gangjin\_49\_2/2016 | A / H5N6  
A/peregrine\_falcon/Niigata/12/2017 | A / H5N6  
A/peregrine\_falcon/Gifu/2102A008/2017 | A / H5N6  
A/tundra\_swan/Niigata/1511C003/2016 | A / H5N6  
A/whooper\_swan/Fukushima/1/2016 | A / H5N6  
A/whooper\_swan/Niigata/5112008/2016 | A / H5N6  
A/environment/Guangdong/GZ670/2015 | A / H5N6  
A/environment/Guangdong/GZ693/2015 | A / H5N6  
A/chicken/Japan/AQ-HE144/2015 | A / H5N6  
A/Guangxi/55726/2016 | A / H5N6  
A/muscovy\_duck/Vietnam/LBM754/2014 | A / H5N6  
A/muscovy\_duck/Vietnam/LBM756/2014 | A / H5N6  
A/duck/Vietnam/LBM760/2014 | A / H5N6  
A/muscovy\_duck/Vietnam/LBM755/2014 | A / H5N6  
A/duck/Vietnam/LBM752/2014 | A / H5N6  
A/feline/Guangdong/1/2015 | A / H5N6  
A/feline/Guangdong/2/2015 | A / H5N6  
A/chicken/Ganzhou/GZ27/2015 | A / H5N6  
A/peregrine\_falcon/HK/4955/2015 | A / H5N6  
A/environment/Guangdong/04.22\_DGCP027/2015 | A / H5N6  
A/white-naped\_crane/China/ya3/2018 | A / H5N6  
A/crane/Beijing/ya3/2018 | A / H5N6  
A/Pavo\_cristatus/China/JS02/2018 | A / H5N6  
A/Pavo\_cristatus/China/JS01/2018 | A / H5N6  
A/Pavo\_cristatus/Jiangxi/JS01/2018 | A / H5N6  
A/duck/Guangdong/01.01\_SZSGXJK001-G/2016 | A / H5N6  
A/Goose/Qingyuan/16875/2016 | A / H5N6  
A/duck/Guangdong/04.23\_DGQTSJ127-O/2015(Mixed) | A / H5N6  
A/Pavo\_cristatus/Jiangxi/JA1/2016 | A / H5N6  
A/chicken/Sichuan/k141/2017 | A / H5N6  
A/chicken/Ganzhou/GZ21/2015 | A / H5N6  
A/duck/Yunnan/03.16\_DQXYL003-O/2015 | A / H5N6  
A/duck/Japan/AQ-HE72/2015 | A / H5N6  
A/Chicken/Guangdong/FG594/2015 | A / H5N6  
A/duck/Guangzhou/018/2014 | A / H5N6  
A/environment/Guangdong/QY197/2014  
A/turtledove/Wuhan/HKBJ07/2015 | A / H5N6  
A/chicken/Wuhan/WHYJ02/2015 | A / H5N6  
A/turtledove/Wuhan/HKBJ43/2015 | A / H5N6  
A/turtledove/Wuhan/WHBJ26/2014 | A / H5N6  
A/chicken/Vietnam/HU4-42/2015 | A / H5N6  
A/duck/Vietnam/HU4-879/2015 | A / H5N6  
A/duck/Shanghai/20180602/2017 | A / H5N1  
A/chicken/Dongguan/2690/2013  
A/chicken/Heilongjiang/S7/2014 | A / H5N2  
A/chicken/Zhejiang/727155/2014 | A / H5N6  
A/Great\_Crested\_Grebe/Ningxia/482-26/2015 | A / H5N6  
A/Gadwall/Ningxia/487-38/2015 | A / H5N6  
A/Ferruginous\_Pochard/Ningxia/479-16/2015 | A / H5N6  
A/Northern\_Shoveler/Ningxia/483-28/2015 | A / H5N6  
A/Ferruginous\_Pochard/Ningxia/480-17/2015 | A / H5N6  
A/Common\_Teal/Ningxia/474-9/2015 | A / H5N6  
A/Ruddy\_Shelduck/Ningxia/486-33/2015 | A / H5N6  
A/duck/Guangzhou/021/2014 | A / H5N6  
A/duck/Guangdong/GD01/2014 | A / H5N6  
A/duck/Guangdong/GD01/2014 | A / H5N6  
A/Streptopelia\_decaocto/China/7/2016 | A / H5N6  
A/chicken/Jiangxi/NCDZT1123/2014 | A / H5N6  
A/chicken/Jiangxi/NCDZT1128/2014 | A / H5N6  
A/chicken/Shenzhen/2269/2013 | A / H5N6  
A/chicken/AnNing/1/2014 | A / H5N1  
A/chicken/TongHai/302/2014 | A / H5N1  
A/chicken/DaLi/302/2014 | A / H5N1  
A/tiger/Yunnan/tig1404/2014 | A / H5N1  
A/duck/Vietnam/LBM632/2014 | A / H5N1  
A/muscovy\_duck/Vietnam/LBM634/2014 | A / H5N1  
A/duck/Vietnam/LBM639/2014 | A / H5N1  
A/duck/Hunan/12.17\_YFQH0018-Z-P/2014 | A / H5N6  
A/quail/Nanchang/6631/2013 | A / H5N1  
A/duck/Nanchang/9789/2013 | A / H5N1  
A/environment/Yunnan/03.16\_DQXYL0027/2015 | A / H5N6  
A/environment/Zhenjiang/C13/2013 | A / H5N6  
A/muscovy\_duck/LS154/2013 | A / H5N1  
A/duck/Hunan/02.26\_YYGK0255-P/2014 | A / H5N6  
A/duck/Vietnam/LBM360c1-4-1/2013 | A / H5N6  
A/chicken/Lampung\_Utara/03160218/2016 | A / H5N1  
A/wild\_duck/Fujian/2/2011 | A / H5N1  
A/environment/Jiangxi/05.07\_NCJD0095C/2015 | A / H5N6  
A/chicken/Guangxi/04.10\_NM140/2015 | A / H5N6  
A/chicken/Guangxi/S2039/2009 | A / H5N1  
A/duck/Vietnam/NCVD-672/2011 | A / H5N1  
A/Guangxi/1/2009 | A / H5N1  
A/breeder\_duck/Korea/Gochang1/2014 | A / H5N8  
A/duck/Eastern\_China/S1210/2013 | A / H5N8  
A/duck/Eastern\_China/L1021/2012 | A / H5N8  
A/duck/Jiangsu/k1203/2010 | A / H5N8  
A/duck/Hubei/ZYSYG18/2015 | A / H5N6  
A/duck/Hubei/ZYSYG5/2015 | A / H5N6  
A/mallard/Korea/W452/2014 | A / H5N8  
A/duck/Hubei/xn/2007 | A / H5N1  
A/duck/Hunan/8/2008 | A / H5N1  
A/duck/Hunan/7/2015 | A / H3N6  
A/duck/Sichuan/04.08\_CDLC161-O/2015 | A / H4N2  
A/duck/Jiangxi/9742/2009 | A / H7N3  
A/jungle\_crow/Hyogo/2803A002/2018 | A / H5N6  
A/Mandarin\_duck/Korea/K18-3/2018 | A / H5N6  
A/Bar-headed\_Goose/Qinghai/BTY1-B/2016 | A / H5N8  
A/wild\_duck/Korea/SH13/2006 | A / H1N1  
A/duck/Hubei/03.06\_WHWT0150-P/2015(Mixed) | A / H5N6  
A/wild\_duck/Shantou/865/2002 | A / H6N2  
A/chicken/Jiangxi/01.08\_YGCB018-P/2015 | A / H3N2  
A/duck/Shantou/7904/2006 | A / H6N2

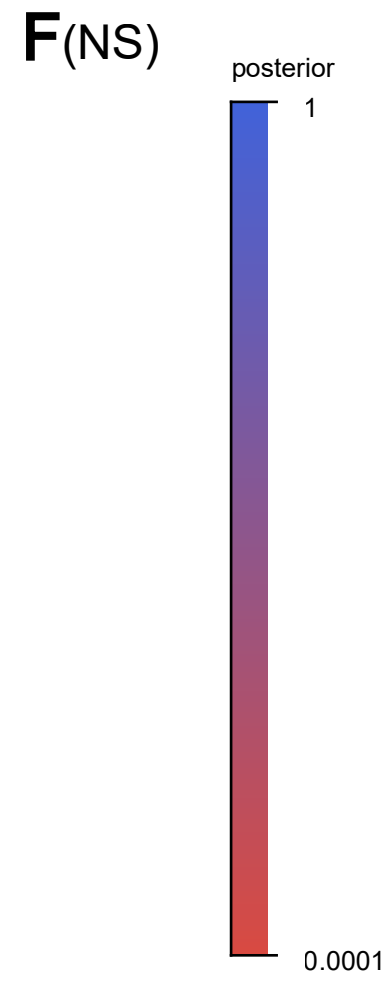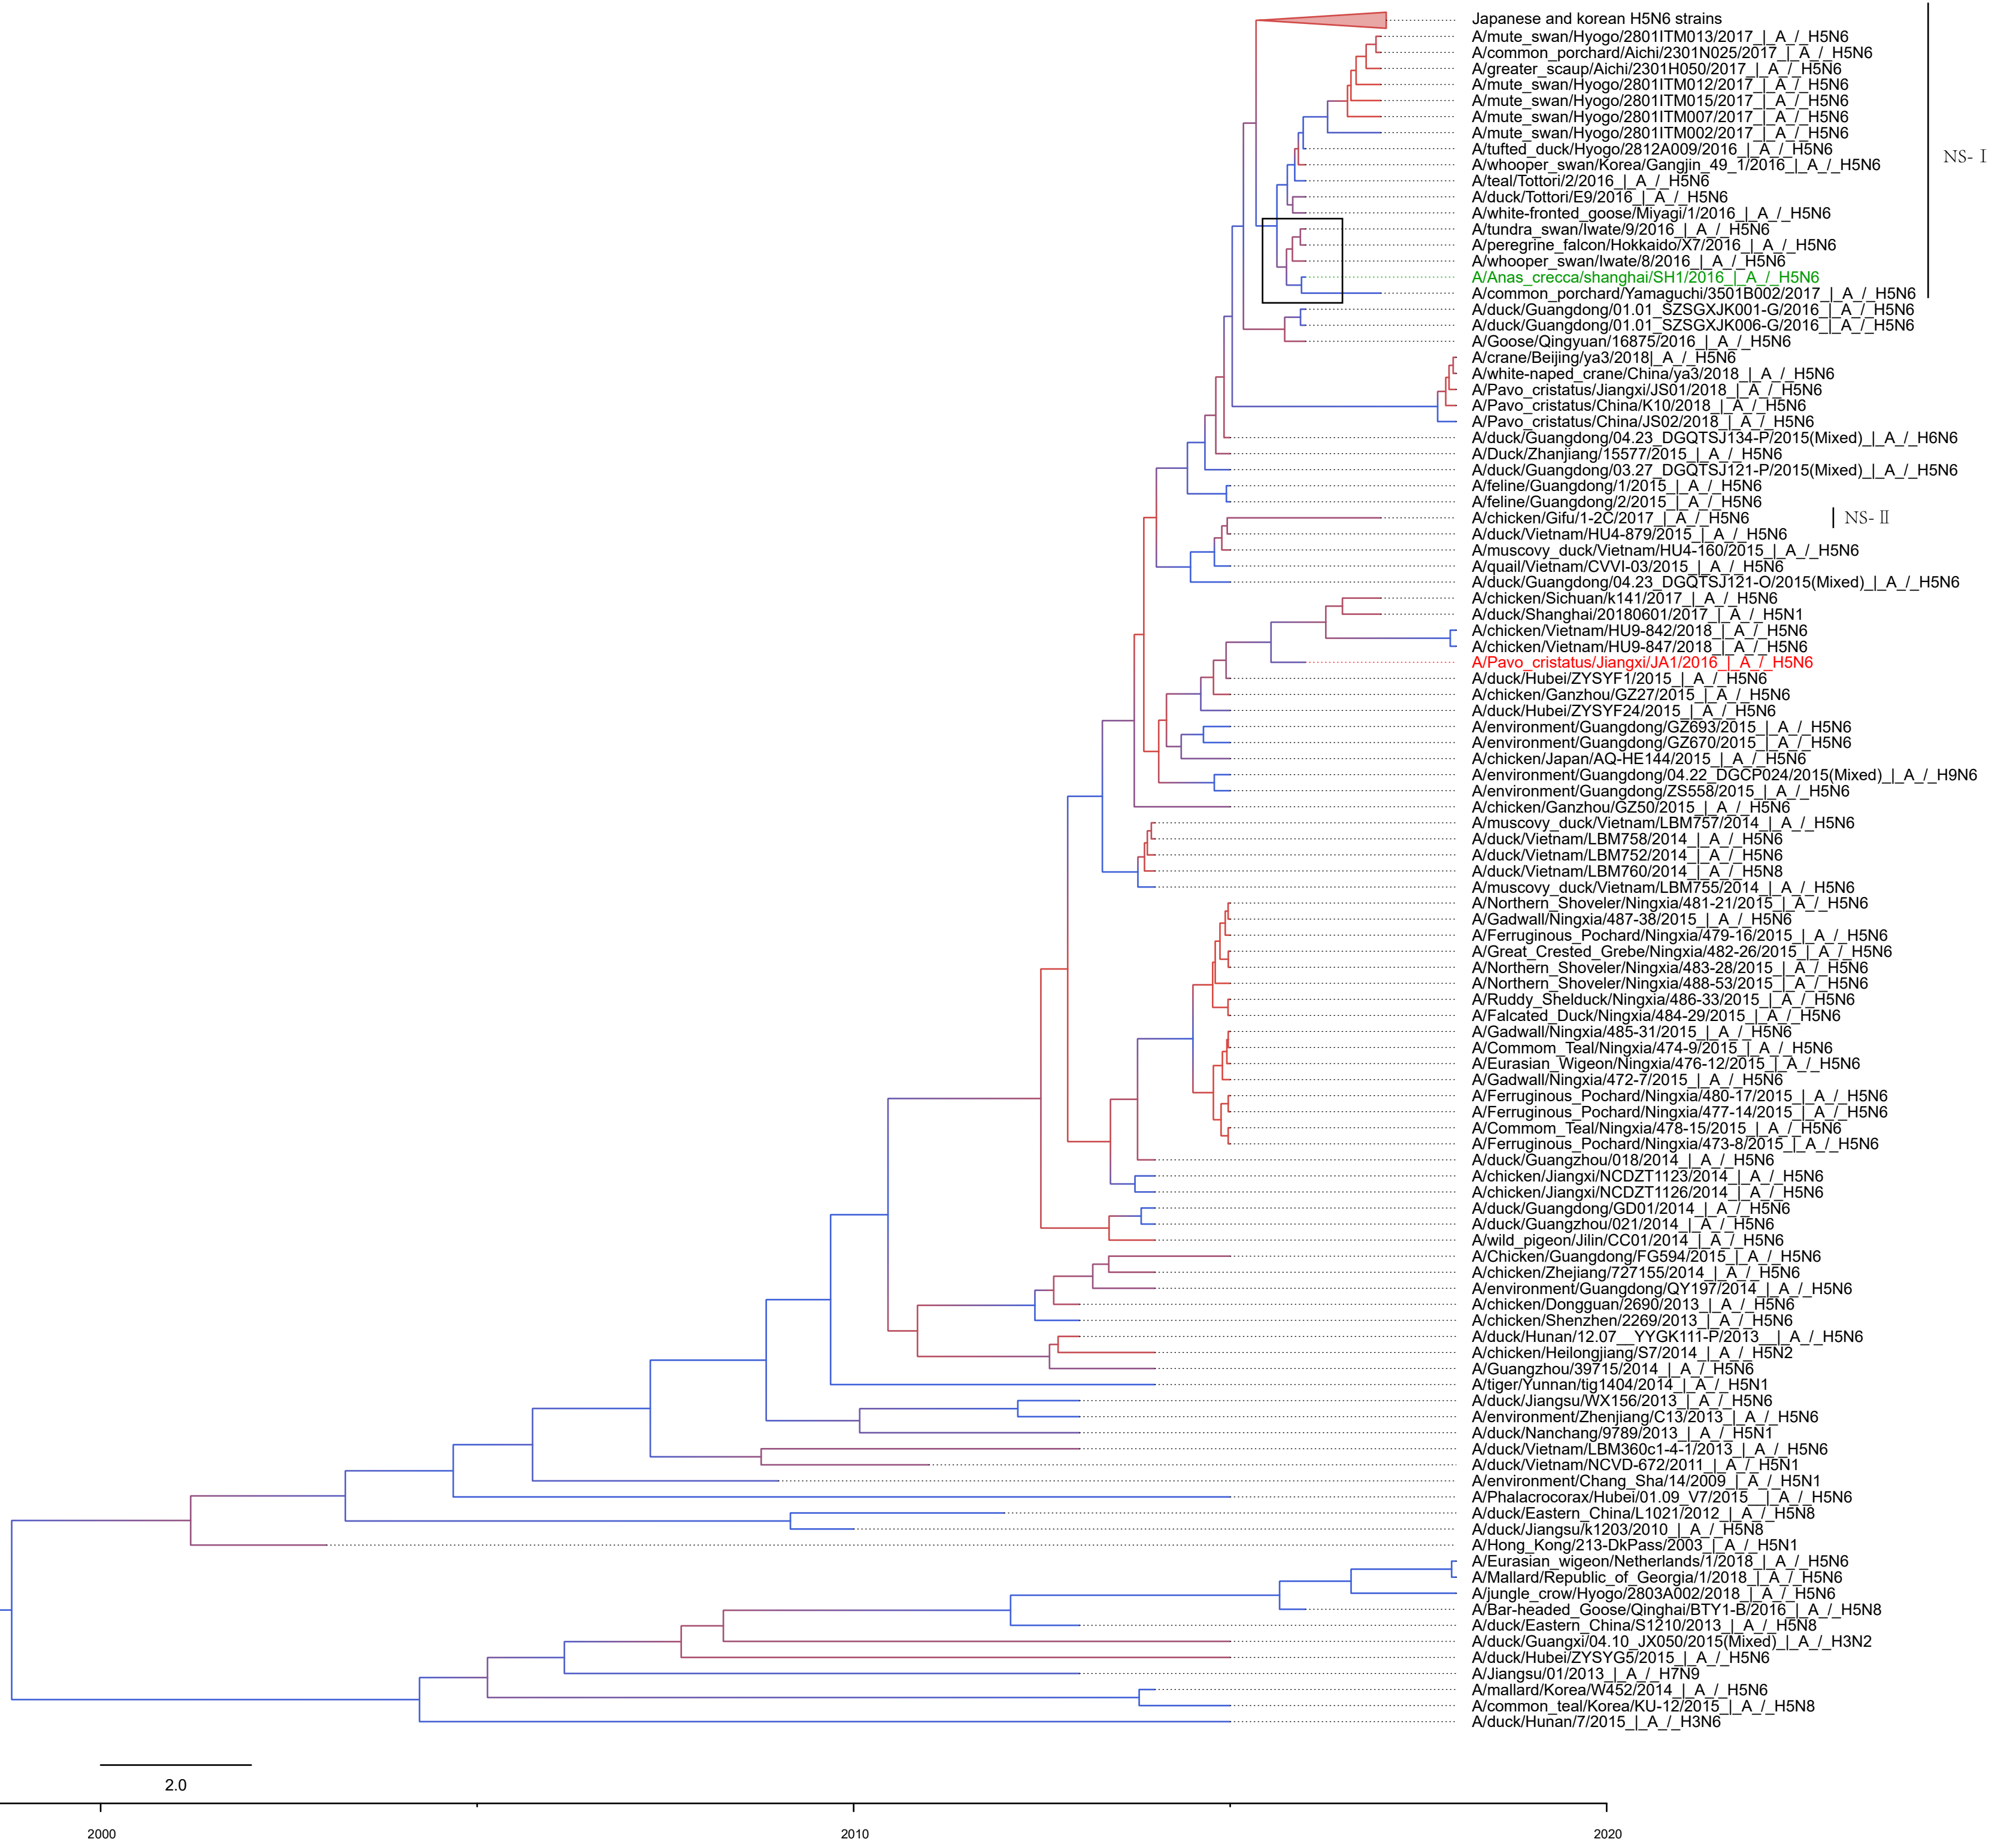

**Supplementary Figure 1.** Genesis analysis of SH1 and JA1. The phylogenetic trees were conducted using gene sequences listed in the NCBI. SH1 is marked in green and JA1 is marked in red. Panels (A) to (E) represent PB2, PB1, PA, NP, M, and NS separately. All the trees were built by BEAST (v 1.8.4) and displayed using FigTree (v 1.4.2).

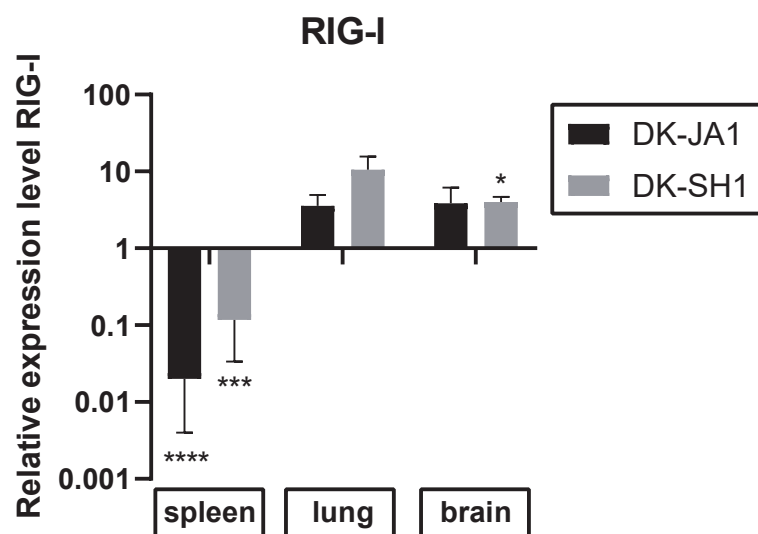

**Supplementary Figure 2.** Expression profiles of RIG-I in the target tissues of chickens and ducks infected with H5N6. Each bar represents the level of target gene mRNA relative to mock after normalizing to GAPDH. Data is expressed as the mean values  $\pm$  standard deviation. Statistical analysis was performed with Student's t-test (\* $p < 0.05$ , \*\* $p < 0.01$ ).



**Supplementary Table S1.** Dataset size and best-fit model for each gene segment.

| Gene segment datasets | Sequence Numbers | Substitution Models | Relax-clock models <sup>a</sup> | Tree Models | MCMC chain length <sup>b</sup> |
|-----------------------|------------------|---------------------|---------------------------------|-------------|--------------------------------|
| HA                    | 97               | GTR+I               | uced                            | GMRF        | 100                            |
| NA                    | 105              | GTR+G               | uced                            | GMRF        | 100                            |
| PB2                   | 164              | GTR+I+G             | uced                            | EG          | 200                            |
| PB1                   | 149              | GTR+G               | uced                            | BSG         | 200                            |
| PA                    | 173              | GTR+G               | uced                            | BSG         | 100                            |
| NP                    | 166              | GTR+G               | uced                            | EG          | 200                            |
| M                     | 155              | HKY+I+G             | uced                            | EG          | 100                            |
| NS                    | 153              | HKY+G               | uced                            | BSG         | 100                            |

<sup>a</sup> uced: uncorrelated exponential clock model

<sup>b</sup> The unit was million.

**Supplementary Table S2.** Groups of chickens (number).

|        | virus            | JA1            |    | SH1            |    |              |
|--------|------------------|----------------|----|----------------|----|--------------|
|        | Observation days | 2 <sup>a</sup> | 14 | 2 <sup>a</sup> | 14 | Total number |
| Groups | Control (PBS)    | 3              | 3  | 3              | 3  | 12           |
|        | treatment        | 3              | 5  | 3              | 5  | 16           |
|        | Contact (naive)  |                | 2  |                | 2  | 4            |
|        | Total number     |                |    |                |    | 32           |

<sup>a</sup>At 2 DPI, three chickens from treatment group and three chickens from control groups were humanely euthanized.

**Supplementary Table S3.** Groups of ducks (number).

|        | virus            | JA1            |    | SH1            |    |              |
|--------|------------------|----------------|----|----------------|----|--------------|
|        | Observation days | 2 <sup>a</sup> | 14 | 2 <sup>a</sup> | 14 | Total number |
| Groups | Control (PBS)    | 3              | 3  | 3              | 3  | 12           |
|        | treatment        | 3              | 5  | 3              | 5  | 16           |
|        | Contact (naive)  |                | 2  |                | 2  | 4            |
|        | Total number     |                |    |                |    | 32           |

<sup>a</sup>At 2 DPI, three ducks from treatment group and three ducks from control groups were humanely euthanized.

**Supplementary Table S4.** Primer sequences used in the study.

| Primer name     | Sequence (5'→3')               | Product size (bp) | accession no.            |
|-----------------|--------------------------------|-------------------|--------------------------|
| C-GAPDH         | F: CCTCTCTGGCAAAGTCCAAG        | 200               | V00407                   |
| C-GAPDH         | R: CATCTGCCCATTTGATGTTG        |                   |                          |
| C-IL-6          | F: ATGTGCAAGAAGTTCACCGTG       | 171               | EU170468                 |
| C-IL-6          | R: TTCCAGGTAGGTCTGAAAGGCGAA    |                   |                          |
| C-IFN- $\gamma$ | F: GCTGACGGTGGACCTATTATT       | 248               | DQ906156                 |
| C-IFN- $\gamma$ | R: TGGATTCTCAAGTCGCTCATCG      |                   |                          |
| C-TLR-7         | F: TGTGATGTGGAAGCCTTTGA        | 218               | DQ780342                 |
| C-TLR-7         | R: ATTATCTTTGGGCCCCAGTC        |                   |                          |
| D-GAPDH         | F: ATGTTTCGTGATGGGTGTGAA       | 176               | AY436595                 |
| D-GAPDH         | R: CTGTCTTCGTGTGTGGCTGT        |                   |                          |
| D-IL-6          | F: TTCGACGAGGAGAAATGCTT        | 150               | AB191038                 |
| D-IL-6          | R: CCTTATCGTCGTTGCCAGAT        |                   |                          |
| D-IFN $\gamma$  | F: GCTGATGGCAATCCTGTTTT        | 247               | AJ012254                 |
| D-IFN $\gamma$  | R: GGATTTTCAAGCCAGTCAGC        |                   |                          |
| D-TLR-7         | F: CCTTTCCAGAGAGCATTCA         | 154               | AY940195                 |
| D-TLR-7         | R: TCAAGAAATATCAAGATAATCACATCA |                   |                          |
| iNOS            | F: CCACCAGGAGATGTTGAATATGTC    | 75                | NM204961/<br>NM001310393 |
| iNOS            | R: CCAGATGTGTGTTTTCCATGCA      |                   |                          |

**Supplementary Table S5.** Gene segments of SH1 demonstrating that it is most closely related to the H5N6 virus that was isolated from Tottori, Japan.

| Gene | Virus with the highest identity                   | Identify(%) |
|------|---------------------------------------------------|-------------|
| HA   | A/duck/Tottori/E9/2016_ _A_ _H5N6                 | 99.65%      |
|      | A/whooper_swan/Korea/Gangjin_49_1/2016_ _A_ _H5N6 | 99.65%      |
| NA   | A/white-fronted_goose/Miyagi/1/2016_ _A_ _H5N6    | 99.72%      |
|      | A/duck/Tottori/E9/2016_ _A_ _H5N6                 | 99.43%      |
| PB2  | A/white-fronted_goose/Miyagi/1/2016_ _A_ _H5N6    | 99.66%      |
|      | A/duck/Tottori/E9/2016_ _A_ _H5N6                 | 99.70%      |
| PB1  | A/pintail/Hokkaido/X8/2016_ _A_ _H5N6             | 99.70%      |
| PA   | A/eurasian_wigeon/Kagoshima/KU-20/2016_ _A_ _H5N6 | 99.87%      |
|      | A/duck/Kagoshima/KU-d35/2016_ _A_ _H5N6           | 99.77%      |
| NP   | A/duck/Kagoshima/KU-d35/2016_ _A_ _H5N6           | 99.87%      |
| M    | A/tufted_duck/Hyogo/2812A009/2016_ _A_ _H5N6      | 99.90%      |
| NS   | A/whooper_swan/Iwate/8/2016_ _A_ _H5N6            | 99.65%      |
|      | A/peregrine_falcon/Hokkaido/X7/2016_ _A_ _H5N6    | 99.77%      |
|      | A/tundra_swan/Iwate/9/2016_ _A_ _H5N6             | 99.77%      |

**Supplementary Table S6 Relative expression levels of immune gene in the spleen of chickens and ducks.**

| Virus         | SH1            | SH1            |                | JA1         | JA1           |                |
|---------------|----------------|----------------|----------------|-------------|---------------|----------------|
| Species       | Ducks (n=3)    | Chickens (n=3) | P <sup>a</sup> | Ducks (n=3) | Chicken (n=3) | P <sup>a</sup> |
| Tissue        | Spleen         | Spleen         |                | Spleen      | Spleen        |                |
| Mortality     | Not Fatal (0%) | Fatal (100%)   |                | Fatal (80%) | Fatal (100%)  |                |
| TLR-7         | 8.34±3.76      | 6.11±5.62      | 0.662678       | 20.88±23.28 | 31.46±31.98   | 0.667504       |
| TLR-3         | 0.00±0.00      | 6.05±4.11      | 0.17316        | 0.08±0.1    | 3.7±0.9       | 0.0049         |
| MDA5          | 0.00±0.00      | 43.13±0.24     | 0.000015       | 0.06±0.09   | 48.15±32.22   | 0.066079       |
| TNF- $\alpha$ | 2.52±1.58      | 5.9±1.16       | 0.067382       | 13.05±15.57 | 8.13±6.27     | 0.718475       |
| IL-1 $\beta$  | 0.24±0.11      | 64.69±53.84    | 0.20661        | 59.72±4.06  | 67.64±28.98   | 0.739134       |
| IL-6          | 2.14±1.15      | 2.36±0.17      | 0.765517       | 8.25±0.07   | 17.03±1.72    | 0.0064         |
| IFN- $\gamma$ | 0.67±0.31      | 98.91±20.43    | 0.001136       | 41.65±12.76 | 23.17±12.94   | 0.153003       |
| i-NOS         | 0.44±0.01      | 7.71±3.14      | 0.052964       | 51.65±28.8  | 11.79±11.02   | 0.088704       |

Levels are given as mean values of target gene mRNA relative to mock after normalizing to GAPDH  
Data is expressed as the mean values  $\pm$  standard deviation. Statistical analysis was performed with Student's t-test <sup>a</sup>Comparison between chickens and ducks.

**Supplementary Table S7 Relative expression levels of immune gene in the lung of chickens and ducks.**

| Virus         | SH1            | SH1            |                | JA1         | JA1           |                |
|---------------|----------------|----------------|----------------|-------------|---------------|----------------|
| Species       | Ducks (n=3)    | Chickens (n=3) | P <sup>a</sup> | Ducks (n=3) | Chicken (n=3) | P <sup>a</sup> |
| Tissue        | Lung           | Lung           |                | Lung        | Lung          |                |
| Mortality     | Not Fatal (0%) | Fatal (100%)   |                | Fatal (80%) | Fatal (100%)  |                |
| TLR-7         | 24.63±9.47     | 3.22±0.18      | 0.085528       | 0.38±0.36   | 45.97±5.45    | 0.007092       |
| TLR-3         | 1.41±0.56      | 8.48±4.16      | 0.235375       | 3.84±0.01   | 0.39±0.34     | 0.079936       |
| MDA5          | 1.51±0.61      | 19.89±4.29     | 0.010576       | 5.55±6.06   | 2.38±2.05     | 0.435579       |
| TNF- $\alpha$ | 0.38±0.19      | 4.51±0.15      | 0.001687       | 0.25±0.33   | 10.39±11.51   | 0.332062       |
| IL-1 $\beta$  | 2.25±0.47      | 4.79±1.7       | 0.143753       | 19.02±17.19 | 75.16±3.86    | 0.045854       |
| IL-6          | 2.44±1.89      | 15.84±5.35     | 0.023829       | 0.53±0.55   | 29.89±5.64    | 0.006074       |
| IFN- $\gamma$ | 3.06±2.33      | 36.35±1.21     | 0.000375       | 0.38±0.36   | 1.74±0.14     | 0.038343       |
| i-NOS         | 16.81±1.8      | 39.88±4.28     | 0.001003       | 0.07±0.08   | 0.09±0.09     | 0.817409       |

Similar to Table S6 for lung. <sup>a</sup>Comparison between chickens and ducks.

**Supplementary Table S8 Relative expression levels of immune gene in the brain of chickens and ducks.**

| Virus         | SH1            | SH1            |                | JA1         | JA1           |                |
|---------------|----------------|----------------|----------------|-------------|---------------|----------------|
| Species       | Ducks (n=3)    | Chickens (n=3) | P <sup>a</sup> | Ducks (n=3) | Chicken (n=3) | P <sup>a</sup> |
| Tissue        | Brain          | Brain          |                | Brain       | Brain         |                |
| Mortality     | Not Fatal (0%) | Fatal (100%)   |                | Fatal (80%) | Fatal (100%)  |                |
| TLR-7         | 8.34±3.76      | 0.88±0.14      | 0.0174         | 10.59±0.93  | 7.36±3.09     | 0.165622       |
| TLR-3         | 0.00±0.00      | 74.61±32.42    | 0.087554       | 5.91±0.39   | 76.83±9.13    | 0.008194       |
| MDA5          | 3.85±1.17      | 440.76±208.89  | 0.097809       | 8.83±4.18   | 296.66±13.76  | 0.000045       |
| TNF- $\alpha$ | 4.77±1.4       | 0.52±0.34      | 0.00693        | 25.27±32.39 | 0.09±0.15     | 0.236653       |
| IL-1 $\beta$  | 1.41±0.35      | 37.56±3.59     | 0.0049         | 14.42±9.08  | 31.06±15.34   | 0.27204        |
| IL-6          | 43.25±10.6     | 3.58±1.29      | 0.115          | 20.12±13.54 | 59.87±24.06   | 0.131566       |
| IFN- $\gamma$ | 1.87±1.22      | 3.77±2.74      | 0.34682        | 8.59±1.44   | 4.06±2.24     | 0.09009        |
| i-NOS         | 5.32±0.39      | 2.08±0.23      | 0.128          | 146.4±3.74  | 6.82±0.78     | 0.000007       |

Similar to Table S9 for brain. <sup>a</sup>Comparison between chickens and ducks.

**Supplementary Table S9 Relative expression levels of immune gene in the spleen and lung of ducks.**

| Virus     | SH1            | JA1         |                | SH1            | JA1         |                |
|-----------|----------------|-------------|----------------|----------------|-------------|----------------|
| Species   | Ducks (n=3)    | Ducks (n=3) | P <sup>a</sup> | Ducks (n=3)    | Ducks (n=3) | P <sup>a</sup> |
| Tissue    | Spleen         | Spleen      |                | Lung           | Lung        |                |
| Mortality | Not Fatal (0%) | Fatal (80%) |                | Not Fatal (0%) | Fatal (80%) |                |
| TLR7      | 8.34±3.76      | 20.88±23.28 | 0.524602       | 24.63±9.47     | 0.38±0.36   | 0.068646       |
| TLR3      | 0.00±0.00      | 0.08±0.1    | 0.370349       | 1.41±0.56      | 3.84±0.01   | 0.025856       |
| RIG-I     | 0.12±0.14      | 0.06±0.09   | 0.435117       | 10.53±8.86     | 3.56±1.41   | 0.249468       |
| MDA5      | 0.00±0.00      | 0.02±0.02   | 0.455521       | 1.51±0.61      | 5.55±6.06   | 0.4472         |
| TNFα      | 2.52±1.58      | 13.05±15.57 | 0.441721       | 0.38±0.19      | 0.25±0.33   | 0.663971       |
| IL-1β     | 0.24±0.11      | 59.72±4.06  | 0.00232        | 2.25±0.47      | 19.02±17.19 | 0.301802       |
| IL-6      | 2.14±1.15      | 8.25±0.07   | 0.005707       | 2.44±1.89      | 0.53±0.55   | 0.275846       |
| IFNγ      | 0.67±0.31      | 41.65±12.76 | 0.00512        | 3.06±2.33      | 0.38±0.36   | 0.223593       |
| iNOS      | 0.44±0.01      | 51.65±28.8  | 0.097107       | 16.81±1.8      | 0.07±0.08   | 0.001112       |

Levels are given as mean values of target gene mRNA relative to mock after normalizing to GAPDH

**Supplementary Table S10 Relative expression levels of immune gene in the brain of ducks.**

| Virus     | SH1            | JA1         |                |
|-----------|----------------|-------------|----------------|
| Species   | Ducks (n=3)    | Ducks (n=3) | P <sup>a</sup> |
| Tissue    | Brain          | Brain       |                |
| Mortality | Not Fatal (0%) | Fatal (80%) |                |
| TLR7      | 8.34±3.76      | 10.59±0.93  | 0.004398       |
| TLR3      | 0.00±0.00      | 5.91±0.39   | 0.041364       |
| RIG-I     | 3.85±1.17      | 3.86±2.31   | 0.939418       |
| MDA5      | 3.85±1.17      | 8.83±4.18   | 0.214794       |
| TNFα      | 4.77±1.4       | 25.27±32.39 | 0.316613       |
| IL-1β     | 1.41±0.35      | 14.42±9.08  | 0.179952       |
| IL-6      | 43.25±10.6     | 20.12±13.54 | 0.197596       |
| IFNγ      | 1.87±1.22      | 8.59±1.44   | 0.010819       |
| iNOS      | 5.32±0.39      | 146.4±3.74  | 0.000006       |

Similar to Table S9 for brain. <sup>a</sup>Comparison between JA1 and SH1.

**Supplementary Table S11 Amino acid differences of whole gene segments between H5N6 HPAIVs, JA1 and SH1.**

| Protein | Amino Acid Position | JA1 | SH1      | Function <sup>a</sup>                                                                                                                                                                         | Reference         |
|---------|---------------------|-----|----------|-----------------------------------------------------------------------------------------------------------------------------------------------------------------------------------------------|-------------------|
| PB2     | 2                   | D   | N        | 1-35.PB1-interacting-region.N-terminal 35 amino acid region of PB2 forms an interface with the C-terminal three helix bundle of PB1 (aa 685-757).                                             | PubMed: 19461581  |
| PB2     | 178                 | T   | A        |                                                                                                                                                                                               |                   |
| PB2     | 221                 | A   | T        |                                                                                                                                                                                               |                   |
| PB2     | 441                 | D   | N        | 320-483 PB2_cap-binding-site.This fragment is a domain co-crystalized with m7GTP.                                                                                                             | PubMed: 18454157  |
| PB1     | 12                  | V   | I        | 1-25 PA-binding-region The N-terminal region of PB1 interacts with the C-terminus of PA (residues                                                                                             | PubMed: 18615018, |
| PB1     | 14                  | V   | A        |                                                                                                                                                                                               |                   |
| PB1     | 54                  | E   | K        |                                                                                                                                                                                               |                   |
| PB1     | 108                 | L   | I        |                                                                                                                                                                                               |                   |
| PB1     | 149                 | I   | V        |                                                                                                                                                                                               |                   |
| PB1     | 157                 | A   | T        |                                                                                                                                                                                               |                   |
| PB1     | 178                 | V   | G        |                                                                                                                                                                                               |                   |
| PB1     | 200                 | V   | I        |                                                                                                                                                                                               |                   |
| PB1     | 298                 | L   | V        |                                                                                                                                                                                               |                   |
| PB1     | 386                 | R   | K        |                                                                                                                                                                                               |                   |
| PB1     | 451                 | I   | V        |                                                                                                                                                                                               |                   |
| PB1     | 517                 | I   | V        |                                                                                                                                                                                               |                   |
| PB1     | 635                 | R   | K        |                                                                                                                                                                                               |                   |
| PB1     | 644                 | I   | V        |                                                                                                                                                                                               |                   |
| PB1     | 654                 | G   | S        |                                                                                                                                                                                               |                   |
| PB1     | 655                 | I   | M        |                                                                                                                                                                                               |                   |
| PB1     | 746                 | I   | T        | 685-757,PB2-binding-region,The C-terminal three helix bundle of PB1 binds to 1-37 and 1-86 fragments on the N-terminus of PB2. This interface is crucial for the regulation of overall enzyme |                   |
| PB1-F2  | 2-39                | DEL | complete |                                                                                                                                                                                               |                   |
| PB1-F2  | 35                  | DEL | S        | S35.PKC phosphorylation site is related to proapoptotic activity of the PB1-F2 in PR8 strains.                                                                                                | PubMed: 19523156  |
| PB1-F2  | 46                  | T   | M        |                                                                                                                                                                                               |                   |
| PB1-F2  | 47                  | S   | N        |                                                                                                                                                                                               |                   |
| PB1-F2  | 48                  | P   | Q        |                                                                                                                                                                                               |                   |
| PB1-F2  | 50                  | G   | D        |                                                                                                                                                                                               |                   |
| PB1-F2  | 52                  | R   | H        |                                                                                                                                                                                               |                   |
| PB1-F2  | 57                  | C   | Y        |                                                                                                                                                                                               |                   |
| PB1-F2  | 62                  | L   | P        |                                                                                                                                                                                               |                   |
| PB1-F2  | 67                  | P   | L        |                                                                                                                                                                                               |                   |
| PB1-F2  | 71                  | S   | Y        |                                                                                                                                                                                               |                   |
| PB1-F2  | 74                  | I   | T        |                                                                                                                                                                                               | PubMed: 18005742  |
| PB1-F2  | 75                  | R   | H        |                                                                                                                                                                                               |                   |
| PB1-F2  | 76                  | A   | V        |                                                                                                                                                                                               |                   |
| PB1-F2  | 83                  | S   | F        |                                                                                                                                                                                               |                   |
| PB1-F2  | 84                  | N   | S        |                                                                                                                                                                                               |                   |

|        |         |                                                     |                                                 |                                                                                                                                                                                                                                                                                                                                                                                                                                                                                                             |                     |
|--------|---------|-----------------------------------------------------|-------------------------------------------------|-------------------------------------------------------------------------------------------------------------------------------------------------------------------------------------------------------------------------------------------------------------------------------------------------------------------------------------------------------------------------------------------------------------------------------------------------------------------------------------------------------------|---------------------|
| PB1-F2 | 62-70   | LSLK<br>NPIQ<br>E                                   | PSLKN<br>LIQ                                    | determinants-of-disease-progression.Immunizing mice with a synthetic peptide corresponding to positions 62-70 of PB1-F2 is recognized by CD8+ T-lymphocytes that lyse virus-infected cells.                                                                                                                                                                                                                                                                                                                 | PubMed:<br>11726970 |
|        | 61-87   | WLSL<br>KNPI<br>QESL<br>KIRA<br>LKR<br>WKLS<br>NKQE | WPSL<br>KNLIQ<br>EYLKT<br>HVLK<br>RWKL<br>FSKQE | W61,P62,S63,L64,K65,N66,L67,I68,Q69,E70,Y71,L72,K73,T74,H75,V76,L77,K78,R79,W80,K81,L82,F83,S84,K85,Q86,E87 (SH1).determinant-of-secondary-bacterial-infections. Enhancement of secondary bacterial pneumonia in mice is seen by pretreatment with PB1-F2 C-terminus derived peptides .                                                                                                                                                                                                                     | PubMed:<br>18005742 |
| PB1-F2 | 89      | T                                                   | I                                               |                                                                                                                                                                                                                                                                                                                                                                                                                                                                                                             |                     |
| PA     | 20      | T                                                   | A                                               |                                                                                                                                                                                                                                                                                                                                                                                                                                                                                                             |                     |
| PA     | 27      | S                                                   | D                                               |                                                                                                                                                                                                                                                                                                                                                                                                                                                                                                             |                     |
| PA     | 63      | A                                                   | V                                               |                                                                                                                                                                                                                                                                                                                                                                                                                                                                                                             |                     |
| PA     | 101     | D                                                   | E                                               |                                                                                                                                                                                                                                                                                                                                                                                                                                                                                                             |                     |
| PA     | 142     | R                                                   | N                                               |                                                                                                                                                                                                                                                                                                                                                                                                                                                                                                             |                     |
| PA     | 261     | M                                                   | L                                               |                                                                                                                                                                                                                                                                                                                                                                                                                                                                                                             |                     |
| PA     | 259-261 | PFM                                                 | PFL                                             | Inflammatory-response_259(3)_259-261_CCR5-signaling-induced.Among 1918 WT and 1918 FS there is no apparent change in histopathological changes. Gene ontology analysis indicated that sequences showing differential expression between 1918 WT and 1918 FS infection were associated predominantly with inflammation or immune response, apoptosis, cell differentiation, tissue remodeling. Genes in CCR5 signaling in macrophages is more highly induced in 1918 FS and 1918 PTC mutants relative to WT. | PubMed:<br>22745253 |
| PA     | 321     | N                                                   | I                                               |                                                                                                                                                                                                                                                                                                                                                                                                                                                                                                             |                     |
| PA     | 327     | D                                                   | E                                               |                                                                                                                                                                                                                                                                                                                                                                                                                                                                                                             |                     |
| PA     | 352     | D                                                   | E                                               |                                                                                                                                                                                                                                                                                                                                                                                                                                                                                                             |                     |
| PA     | 391     | K                                                   | R                                               |                                                                                                                                                                                                                                                                                                                                                                                                                                                                                                             |                     |
| PA     | 404     | S                                                   | A                                               |                                                                                                                                                                                                                                                                                                                                                                                                                                                                                                             |                     |
| PA     | 407     | V                                                   | I                                               |                                                                                                                                                                                                                                                                                                                                                                                                                                                                                                             |                     |
| PA     | 492     | R                                                   | K                                               |                                                                                                                                                                                                                                                                                                                                                                                                                                                                                                             |                     |
| PA     | 538     | V                                                   | E                                               |                                                                                                                                                                                                                                                                                                                                                                                                                                                                                                             |                     |
| PA     | 614     | T                                                   | N                                               |                                                                                                                                                                                                                                                                                                                                                                                                                                                                                                             |                     |
| PA     | 631     | S                                                   | G                                               | determinant-of-virulence.P assaging of Hk150 viruses in mouse brain and embryonated eggs led to the selection of high and low virulent variants in the mice model respectively. These phenotypic changes are conferred by changes in amino acids in HA residues (211), PB1 (456 and 712), NP (127) and NS1 (101) proteins, together with the PA (631)                                                                                                                                                       | PubMed:<br>10873787 |
| PA     | 683     | L                                                   | H                                               |                                                                                                                                                                                                                                                                                                                                                                                                                                                                                                             |                     |
| PA     | 688     | D                                                   | E                                               |                                                                                                                                                                                                                                                                                                                                                                                                                                                                                                             |                     |

|      |                        |            |            |                                                                                                                                                                                                                                                                                                                                                                                                    |                                                                 |
|------|------------------------|------------|------------|----------------------------------------------------------------------------------------------------------------------------------------------------------------------------------------------------------------------------------------------------------------------------------------------------------------------------------------------------------------------------------------------------|-----------------------------------------------------------------|
| PA   | 257-716                |            |            | PB1-binding-region.The C-terminus of PA interacts with the N-terminal region of PB1 (residues 1-25). This subunit interface complex is essential for initiation of transcription.                                                                                                                                                                                                                  | PubMed:<br>18615018                                             |
| PA-X | 20                     | T          | A          |                                                                                                                                                                                                                                                                                                                                                                                                    |                                                                 |
| PA-X | 27                     | S          | D          |                                                                                                                                                                                                                                                                                                                                                                                                    |                                                                 |
| PA-X | 63                     | A          | V          |                                                                                                                                                                                                                                                                                                                                                                                                    |                                                                 |
| PA-X | 101                    | D          | E          |                                                                                                                                                                                                                                                                                                                                                                                                    |                                                                 |
| PA-X | 142                    | R          | N          |                                                                                                                                                                                                                                                                                                                                                                                                    |                                                                 |
| PA-X | 193                    | N          | S          |                                                                                                                                                                                                                                                                                                                                                                                                    |                                                                 |
| PA-X | 204                    | G          | D          |                                                                                                                                                                                                                                                                                                                                                                                                    |                                                                 |
| PA-X | 215                    | L          | P          |                                                                                                                                                                                                                                                                                                                                                                                                    |                                                                 |
| PA-X | 228                    | I          | T          |                                                                                                                                                                                                                                                                                                                                                                                                    |                                                                 |
| PA-X | 248                    | K          | R          |                                                                                                                                                                                                                                                                                                                                                                                                    |                                                                 |
| PA-X | 251                    | R          | K          |                                                                                                                                                                                                                                                                                                                                                                                                    |                                                                 |
| HA   | -8                     | S          | A          | -1--16.signal-peptide.This region denotes a potential N-terminal signal peptide                                                                                                                                                                                                                                                                                                                    |                                                                 |
| HA   | 40                     | K          | R          |                                                                                                                                                                                                                                                                                                                                                                                                    |                                                                 |
| HA   | 83                     | A          | T          |                                                                                                                                                                                                                                                                                                                                                                                                    |                                                                 |
| HA   | 126                    | T          | E          |                                                                                                                                                                                                                                                                                                                                                                                                    |                                                                 |
| HA   | 97,108,126,138,212,217 | DITQ<br>KS | DIEQK<br>S | determinants-of-pathogenicity.Recombinants with changed HA residues: 97, 108, 126, and 138 reduced the pathogenicity of the highly pathogenic A/chicken/Hong Kong/YU562/01 virus and increased the pathogenicity of the mildly pathogenic A/goose/Hong Kong/437-10/99 virus.The substitutions E212K, and P217S resulted in increased pathogenicity of both high and moderately pathogenic viruses. | PubMed:<br>15331729                                             |
| HA   | 127                    | S          | T          |                                                                                                                                                                                                                                                                                                                                                                                                    |                                                                 |
| HA   | 140                    | M          | V          |                                                                                                                                                                                                                                                                                                                                                                                                    |                                                                 |
| HA   | 162                    | M          | K          |                                                                                                                                                                                                                                                                                                                                                                                                    |                                                                 |
| HA   | 169                    | R          | G          |                                                                                                                                                                                                                                                                                                                                                                                                    |                                                                 |
| HA   | 185                    | E          | A          |                                                                                                                                                                                                                                                                                                                                                                                                    |                                                                 |
| HA   | 223                    | R          | Q          | species-adaptation_239(1)_239N_Increased-binding-to-alpha2-6.Introduction of Ser223Asn substitution in the A/Vietnam/1203/2004 backbone conferred increased binding to 6' sialyl lactosamine relative to WT parental virus using ELISA based                                                                                                                                                       | PubMed:16226289<br>,<br>PubMed:20130132<br>,<br>PubMed:20392847 |
| HA   | 234                    | R          | K          |                                                                                                                                                                                                                                                                                                                                                                                                    |                                                                 |
| HA   | 259                    | T          | K          |                                                                                                                                                                                                                                                                                                                                                                                                    |                                                                 |
| HA   | 155,156,223            | DAR        | DAQ        | determinant-of-virulence NAN_Deceased-virulence.Introduction of NAN substitutions in the A/Vietnam/1203/2004 backbone conferred increased affinity for alpha2-6SAL using solid phase assay. The mutant virus showed 100 fold reduction in the lethality of WT.                                                                                                                                     | PubMed:19116267                                                 |

|     |                     |           |           |                                                                                                                                                                                                                                                                                                                                                                                                                                                                                                                                                                  |                                                  |
|-----|---------------------|-----------|-----------|------------------------------------------------------------------------------------------------------------------------------------------------------------------------------------------------------------------------------------------------------------------------------------------------------------------------------------------------------------------------------------------------------------------------------------------------------------------------------------------------------------------------------------------------------------------|--------------------------------------------------|
| HA  | 183,223             | NR        | NQ        | GN_Increased-binding-to-alpha2-6.Introduction of GN in the A/Vietnam/1203/2004 backbone conferred increased binding to alpha 2-6 while retaining strong preference for alpha 2-3 sialoglycans using glycan array analysis.                                                                                                                                                                                                                                                                                                                                       | PubMed:20392847                                  |
| HA  | 182,192,222,223,224 | NKQR<br>G | NKQQ<br>G | KRLNS_Increased-binding-to-alpha2-6.Introduction of KRLNS substitutions in the A/Indonesia/5/2005 backbone agglutinated alpha 2-6 and retained affinity for alpha 2-3 in shown using hemagglutination assay with modified turkey                                                                                                                                                                                                                                                                                                                                 | PubMed:20392847                                  |
| HA  | 273                 | N         | H         |                                                                                                                                                                                                                                                                                                                                                                                                                                                                                                                                                                  |                                                  |
| HA  | 276                 | A         | T         |                                                                                                                                                                                                                                                                                                                                                                                                                                                                                                                                                                  |                                                  |
| NP  | 51                  | D         | G         | 1-77.RNA-binding-subregion                                                                                                                                                                                                                                                                                                                                                                                                                                                                                                                                       |                                                  |
| NP  | 167                 | V         | M         | 79-180.RNA-binding-subregion                                                                                                                                                                                                                                                                                                                                                                                                                                                                                                                                     |                                                  |
| NP  | 430                 | A         | T         | 340-498.PB2-binding-site;371-465.NP-association-region;255-465.PB2-interaction-domain                                                                                                                                                                                                                                                                                                                                                                                                                                                                            | PubMed: 9621005<br>10405371 9621005              |
| NA  | 27                  | A         | T         |                                                                                                                                                                                                                                                                                                                                                                                                                                                                                                                                                                  |                                                  |
| NA  | 45                  | I         | M         |                                                                                                                                                                                                                                                                                                                                                                                                                                                                                                                                                                  |                                                  |
| NA  | 50                  | T         | M         |                                                                                                                                                                                                                                                                                                                                                                                                                                                                                                                                                                  |                                                  |
| NA  | 76                  | V         | M         |                                                                                                                                                                                                                                                                                                                                                                                                                                                                                                                                                                  |                                                  |
| NA  | 249                 | N         | S         |                                                                                                                                                                                                                                                                                                                                                                                                                                                                                                                                                                  |                                                  |
| NA  | 262                 | M         | K         |                                                                                                                                                                                                                                                                                                                                                                                                                                                                                                                                                                  |                                                  |
| NA  | 397                 | I         | V         |                                                                                                                                                                                                                                                                                                                                                                                                                                                                                                                                                                  |                                                  |
| M1  | 168                 | I         | T         | 1-252.RNP-binding-region.This C-terminal region binds to vRNP.                                                                                                                                                                                                                                                                                                                                                                                                                                                                                                   | UniProt: P03485 ,<br>PubMed:<br>11222100         |
| M1  | 227                 | A         | T         |                                                                                                                                                                                                                                                                                                                                                                                                                                                                                                                                                                  |                                                  |
| M2  | 13                  | S         | N         |                                                                                                                                                                                                                                                                                                                                                                                                                                                                                                                                                                  |                                                  |
| M2  | 50                  | Y         | C         | The cysteine residue at this site is is responsible for thio-ether linkage of the fatty acid. palmitoylation. The viruses lacking the palmitoylation site at this residue have been shown to cause a modest reduction in virulence in vivo (mouse models) although the effect is not seen tissue culture cells;46-60.CRAC-motif.This is the 'cholesterol recognition consensus (CRAC) motif' found downstream of the transmembrane domain in the cytoplasmic tail region and also possess the C50 palmitoylation site. It is involved in M2 cholesterol binding. | PubMed:7529332,<br>19553312,1522123<br>5         |
| NS1 | 65                  | M         | V         | 1-73.RNA-binding-domain.The N-terminal domain of NS1 binds several RNA species, including dsRNA. This domain also mediates interactions with RIG-I, possibly via dsRNA intermediates, PABPI, and importin-alpha.                                                                                                                                                                                                                                                                                                                                                 | PubMed:<br>18796704,<br>17475623,<br>18813227    |
| NS1 | 70                  | D         | N         |                                                                                                                                                                                                                                                                                                                                                                                                                                                                                                                                                                  |                                                  |
| NS1 | 76                  | A         | T         | 74-86.inter-domain-linker.Flexible linker between the RNA binding and effector domains. Can be variable in length, with a 5aa deletion commonly reported in recent H5N1 isolates.                                                                                                                                                                                                                                                                                                                                                                                | PubMed:<br>18987632,<br>UniProt: P03496          |
| NS1 | 86                  | A         | T         | 74-86.inter-domain-linker; 81-113.eIF4GI-interaction-site.Interaction of NS1 with eIF4GI may lead to preferential translation of viral mRNAs;                                                                                                                                                                                                                                                                                                                                                                                                                    | PubMed:<br>18987632,1093810<br>2 UniProt: P03496 |



|     |         |       |       |                                                                                                                                                                                                                                                                                                                                                                                                                                                                                                                                                                                                                        |                                                                                     |
|-----|---------|-------|-------|------------------------------------------------------------------------------------------------------------------------------------------------------------------------------------------------------------------------------------------------------------------------------------------------------------------------------------------------------------------------------------------------------------------------------------------------------------------------------------------------------------------------------------------------------------------------------------------------------------------------|-------------------------------------------------------------------------------------|
| NS1 | 88      | R     | C     | 81-113.eIF4GI-interaction-site.Interaction of NS1 with eIF4GI may lead to preferential translation of viral mRNAs;                                                                                                                                                                                                                                                                                                                                                                                                                                                                                                     | PubMed: 10938102                                                                    |
| NS1 | 139     | G     | N     | 137-147,nuclear-export-signal.Sequence added to a heterologous protein causes nuclear export. L144 and L146 are essential for this activity;87-203,effector-domain.The NS1 effector domain mediates interactions with several host proteins and may stabilize the N-terminal RNA-binding domain.                                                                                                                                                                                                                                                                                                                       | PubMed: 9560194,<br>UniProt: P03496;<br>PubMed: 18725644,<br>18796704,<br>16715094, |
| NS1 | 215     | P     | S     | Threonine-215(T-215) is phosphorylated by a subset of proline-directed kinases (e.g. CDKs/ERKs) acting via a defined motif. Required for efficient virus replication in tissue-culture;204-230,flexible-tail.The flexible tail appears to be unstructured and variable in length. It contains a number of motifs, including CDK/ERK phosphorylation, Crk/CrkL SH3 binding, PDZ ligand and NoLS/NLS2;<br>212,214,215,217,Crk/CrkL-SH3-binding-site.Crk/CrkL-SH3 binding motif commonly found in avian influenza A virus strains as well as in the human 1918 pandemic virus. Shown to be required for Crk/CrkL binding. | PubMed: 19007960;<br>PubMed: 18585749,<br>UniProt: P03496;<br>PubMed: 18165234      |
| NS1 | 230     | V     | I     | 204-230,flexible-tail.The flexible tail appears to be unstructured and variable in length. It contains a number of motifs, including CDK/ERK phosphorylation, Crk/CrkL SH3 binding, PDZ ligand and NoLS/NLS2;223-237,PABPII-binding-site.Refers to poly(A)-binding protein II (PABPII)-binding region of NS1. May be involved in inhibiting the posttranscriptional 3'-end processing of cellular pre-mRNAs;226-230,Tissue-tropism.                                                                                                                                                                                    | PubMed: 18585749,<br>UniProt: P03496;<br>PubMed: 10205180,<br>11421366              |
| NS1 | 226-230 | IESEV | IESEI | Tissue-tropism_226(5)_ESEV/EPEV_Histologic-alteration; Clinical-symptoms-of-disease_226(5)_ESEV/EPEV_Significant-weight-loss.Introduction of the PL motif at the C terminal in the virus A/WSN/33 conferred significant weight loss compared to WT. The virus variant showed severe alveolitis and hemorrhage in lung tissue of mice.                                                                                                                                                                                                                                                                                  | PubMed: 18334632                                                                    |
| NS1 | 227-230 | ESEV  | ESEI  | 227-230 PDZ-ligand-motif Binds PDZ-domain containing proteins. The C-terminal motif is found primarily in avian isolates (common variants include av=ESEV/EPEV/KSEV, hu=RSKV/RSEV). Note: RSKV/RSEV is not                                                                                                                                                                                                                                                                                                                                                                                                             | PubMed: 16439620,<br>20702615,<br>18334632,<br>20410267,                            |
| NEP | 83      | V     | I     |                                                                                                                                                                                                                                                                                                                                                                                                                                                                                                                                                                                                                        |                                                                                     |

<sup>a</sup>Sequence functional features in segments were identified using Influenza Research Database (IRD, <https://www.fludb.org/>)

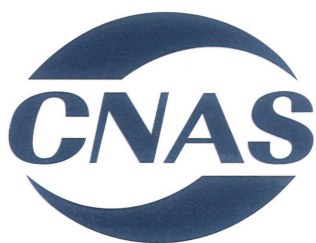

# China National Accreditation Service for Conformity Assessment

## LABORATORY ACCREDITATION CERTIFICATE

(Registration No. CNAS BL0034)

### **BSL-3 Laboratory, Institute of Microbiology, Chinese Academy of Sciences**

Block 3, No.1, Beichen West Road, Chaoyang District, Beijing, China

***is accredited to CNAS-CL05:2009 Accreditation Criteria for Laboratory  
Bio-safety (Including GB19489:2008 Laboratories —General  
Requirements for Bio-safety and the relevant requirements of Regulations  
on Administration of Bio-safety in Pathogenic Microorganism Laboratories)  
as ABSL-3 laboratory.***

***It is a laboratory working on conventional amount of pathogenic  
bio-agents which transmit through aerosols under the condition of  
availably using primary bio-safety isolation equipments in all procedures.***

Date of Issue: 2017-08-04

Date of Expiry: 2022-08-03

Date of Initial Accreditation: 2012-04-20

Signed on behalf of China National Accreditation Service for Conformity Assessment

A handwritten signature in black ink, consisting of stylized Chinese characters, positioned to the right of the signature line.

China National Accreditation Service for Conformity Assessment (CNAS) is authorized by Certification and Accreditation Administration of the People's Republic of China (CNCA) to operate the national accreditation schemes for conformity assessment. CNAS is a member of the International Laboratory Accreditation Cooperation (ILAC) and the Asia Pacific Laboratory Accreditation Cooperation (APLAC).
